# Supplementary material
Source: PubMed Central journal article supplement (PMC3799953)
Supplement: NIHMS510851-supplement-2.pdf [file NIHMS510851-supplement-2.pdf]

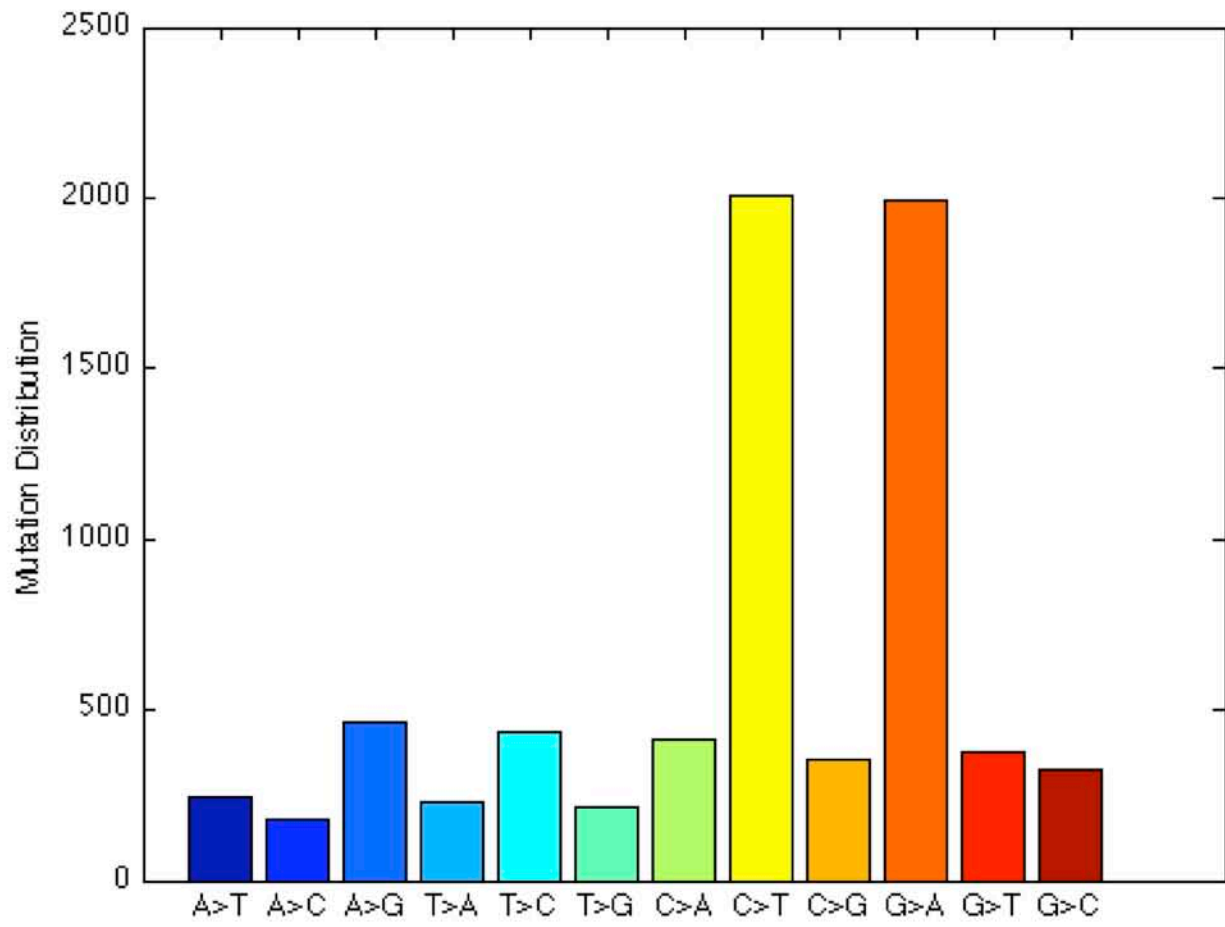

**Supplementary Figure 1.** Distribution of substitutions from whole exome data.

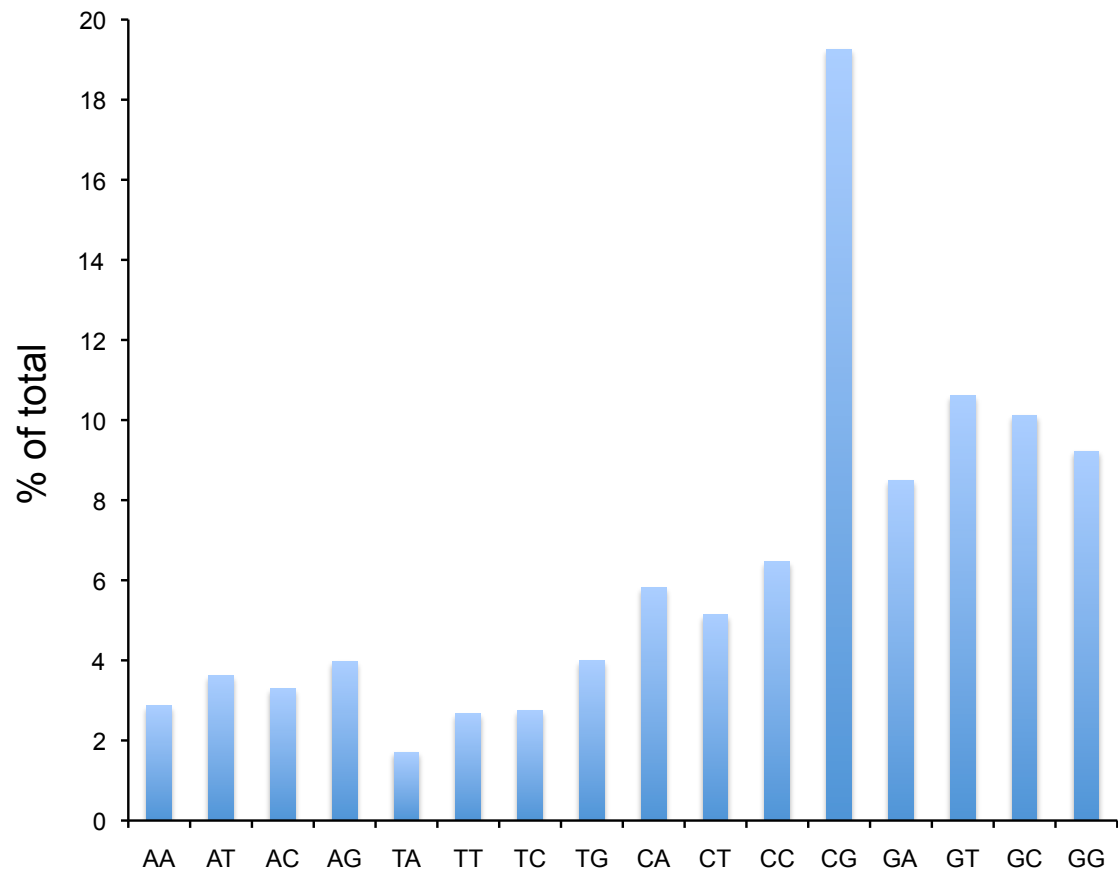

**Supplementary Figure 2.** Dinucleotide distribution in mutated sites.

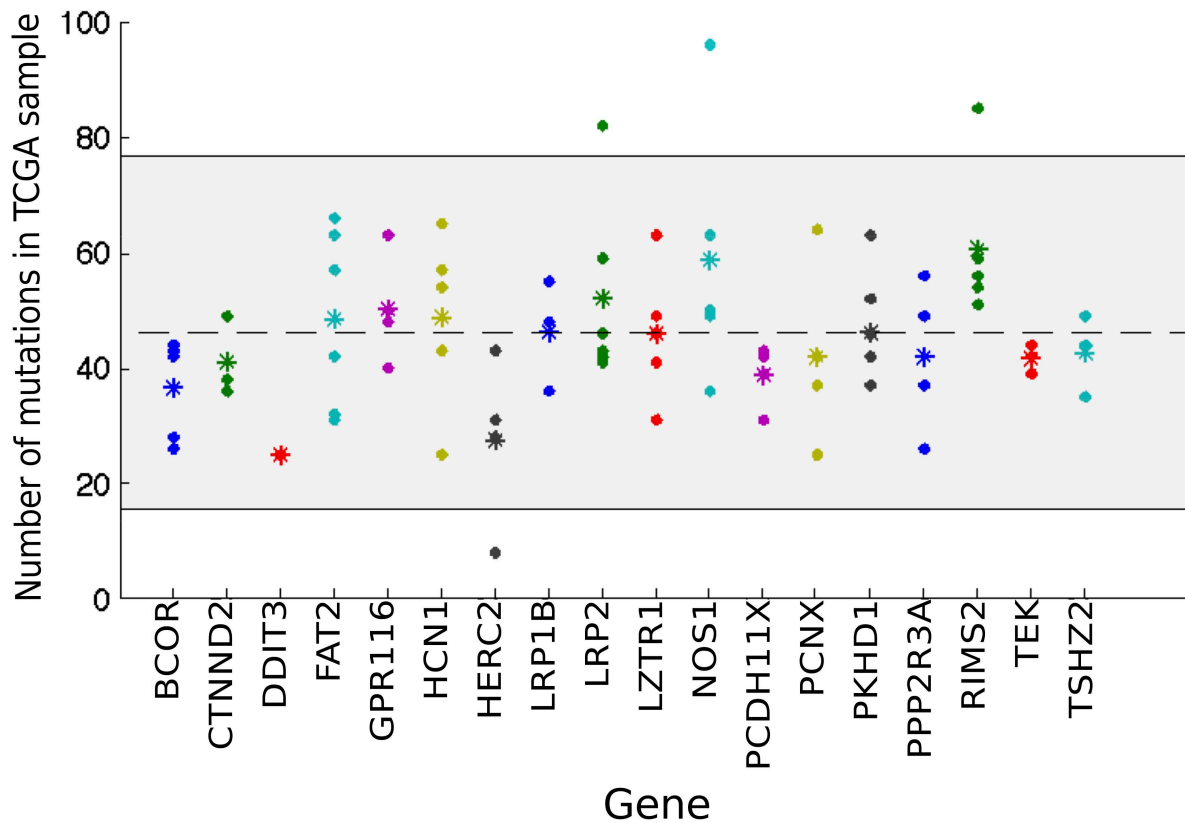

**Supplementary Figure 3.** Number of mutations in TCGA samples harboring MutComFocal gene candidates. For a given gene  $G$ , we plot the number of mutations  $M_G$  in samples harboring  $G$  as solid circles. We also plot the mean of  $M_G$  as asterisks. Given the mean  $\mu$  and standard deviation  $\sigma$  of the number of mutations in all TCGA samples, we plot the 95% confidence interval of a sample being hyper-mutated ( $\mu \pm 1.96 \cdot \sigma$ ) and show that for all  $G$ , the mean of  $M_G$  falls well within the 95% confidence interval, demonstrating that MutComFocal genes do not tend to occur in hypermutated samples.



domain architecture, and unlike the BTB-BACK-Kelch proteins<sup>2</sup>, there has been little, if any, duplication of the LZTR-1 gene since its appearance. Despite its name, LZTR-1 does not contain a leucine zipper region.

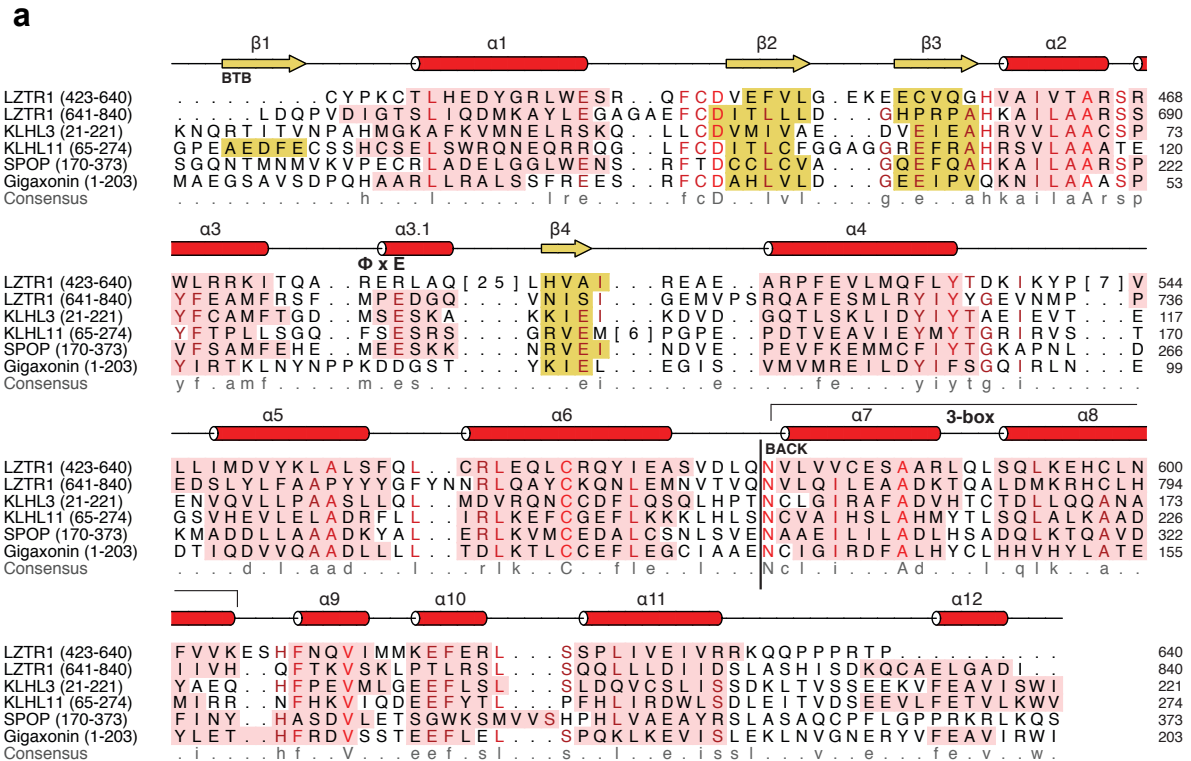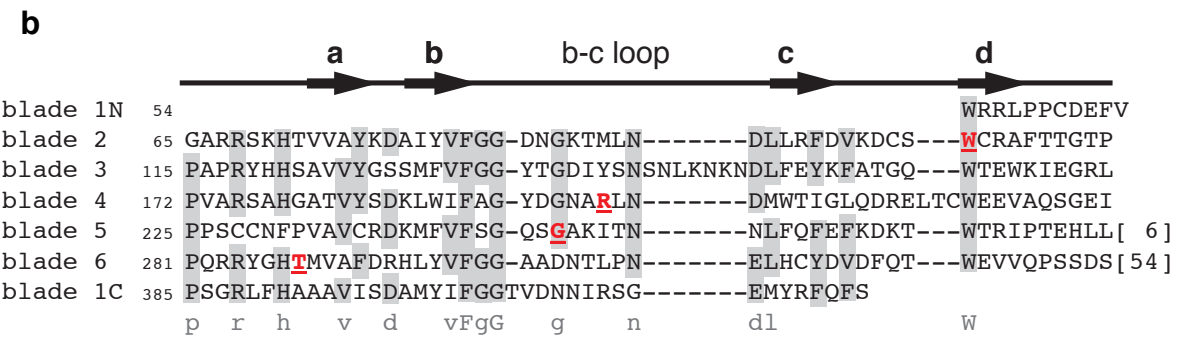

**Supplementary Figure 5.** Sequence alignment of BTB-BACK domains and the Kelch domain. a, The two BTB-BACK domains of LZTR-1 are included along with the predicted secondary structure from HHpred<sup>3</sup>. The 3-box is the Cul3 binding element within the BACK domain. The secondary structure of KLHL3 (PDB ID 4HXI), KLHL11 (PDB ID 4AP2) and Gigaxonin (PDB ID 3HVE) are indicated with shading and are based on the crystal structures. The secondary structure of SPOP is based on a crystal structure for the BTB and 3-box region (PDB ID 3HTM) and HHpred predictions from the remainder of the BACK domain. Only the N-terminal half of the BACK domain from KLHL3, KLHL11 and Gigaxonin is included, as SPOP and LZTR-1 contain truncated versions of the BACK domain. b, Sequence alignment of the six blades from the Kelch

$\beta$ -propeller domain. Each blade contains four core  $\beta$ -strands, labeled a, b, c, d. Conserved residues are highlighted in gray and residues mutated in GBM are shown in red. Insertions at the end of blades 5 and 6 are indicated in brackets. The nonsense mutation E353STOP is located between Kelch blades 6 and 1c.

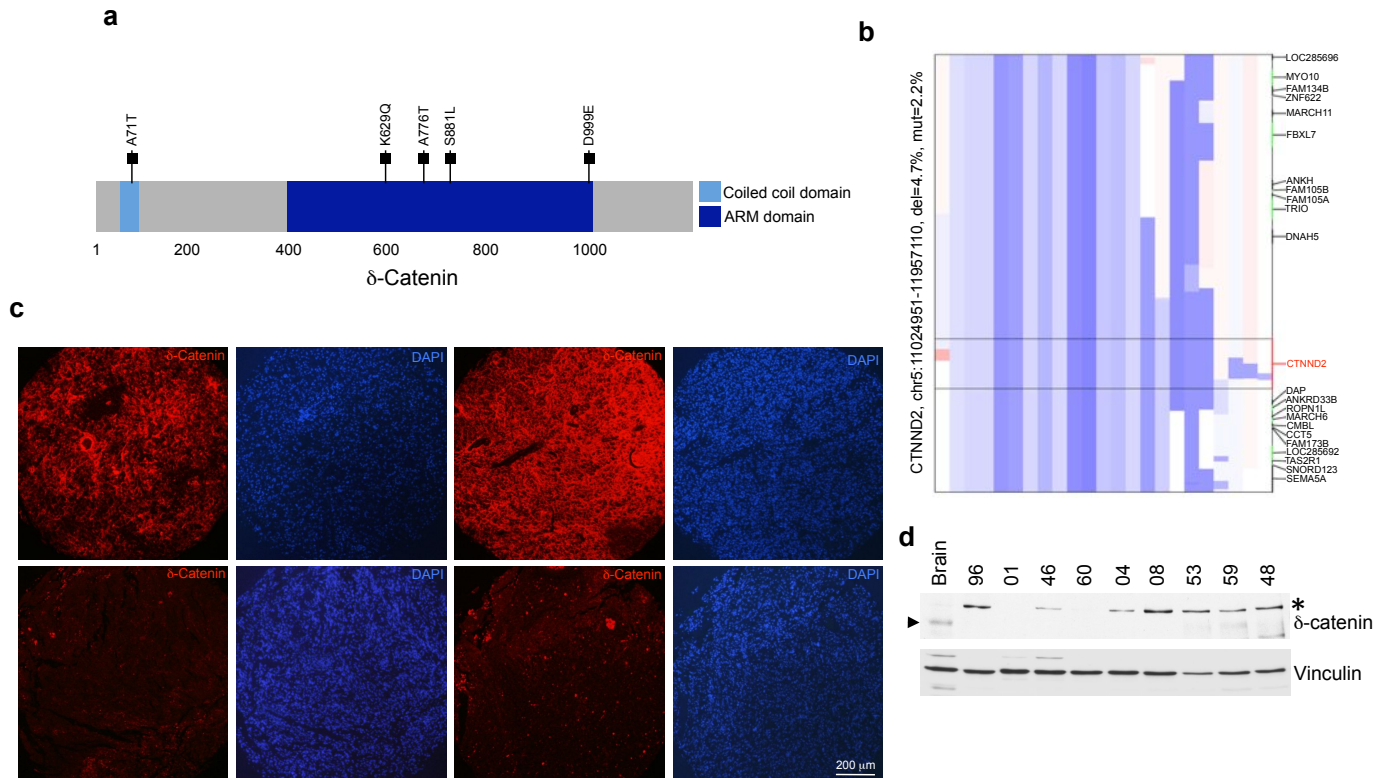

**Supplementary Figure 6.** Pattern of somatic mutations, CNVs and expression of *CTNND2* in GBM. **a**, Schematic representation of identified somatic mutations in *CTNND2* shown in the context of the known domain structure of the protein. Numbers refer to amino acid residues of the  $\delta$ -catenin protein. **b**, Somatic deletions of *CTNND2*. Samples are sorted according to the focality of *CTNND2* deletion. In the red-blue scale, white corresponds to normal (diploid) copy number, blue is deletion and red is gain. **c**, Immunofluorescence staining of human primary GBM included in tissue microarrays (TMA) using  $\delta$ -catenin antibody (red); Nuclei are counterstained with Dapi (blue). Two representative  $\delta$ -catenin-positive and two  $\delta$ -catenin-negative tumors are shown in the upper and lower panels, respectively. **d**, Western Blot analysis of the expression of  $\delta$ -catenin in a panel of GBM-derived glioma sphere cultures. Brain, normal human brain. Arrowhead indicated  $\delta$ -catenin; Asterisk, non-specific band. Vinculin is shown as control for loading.



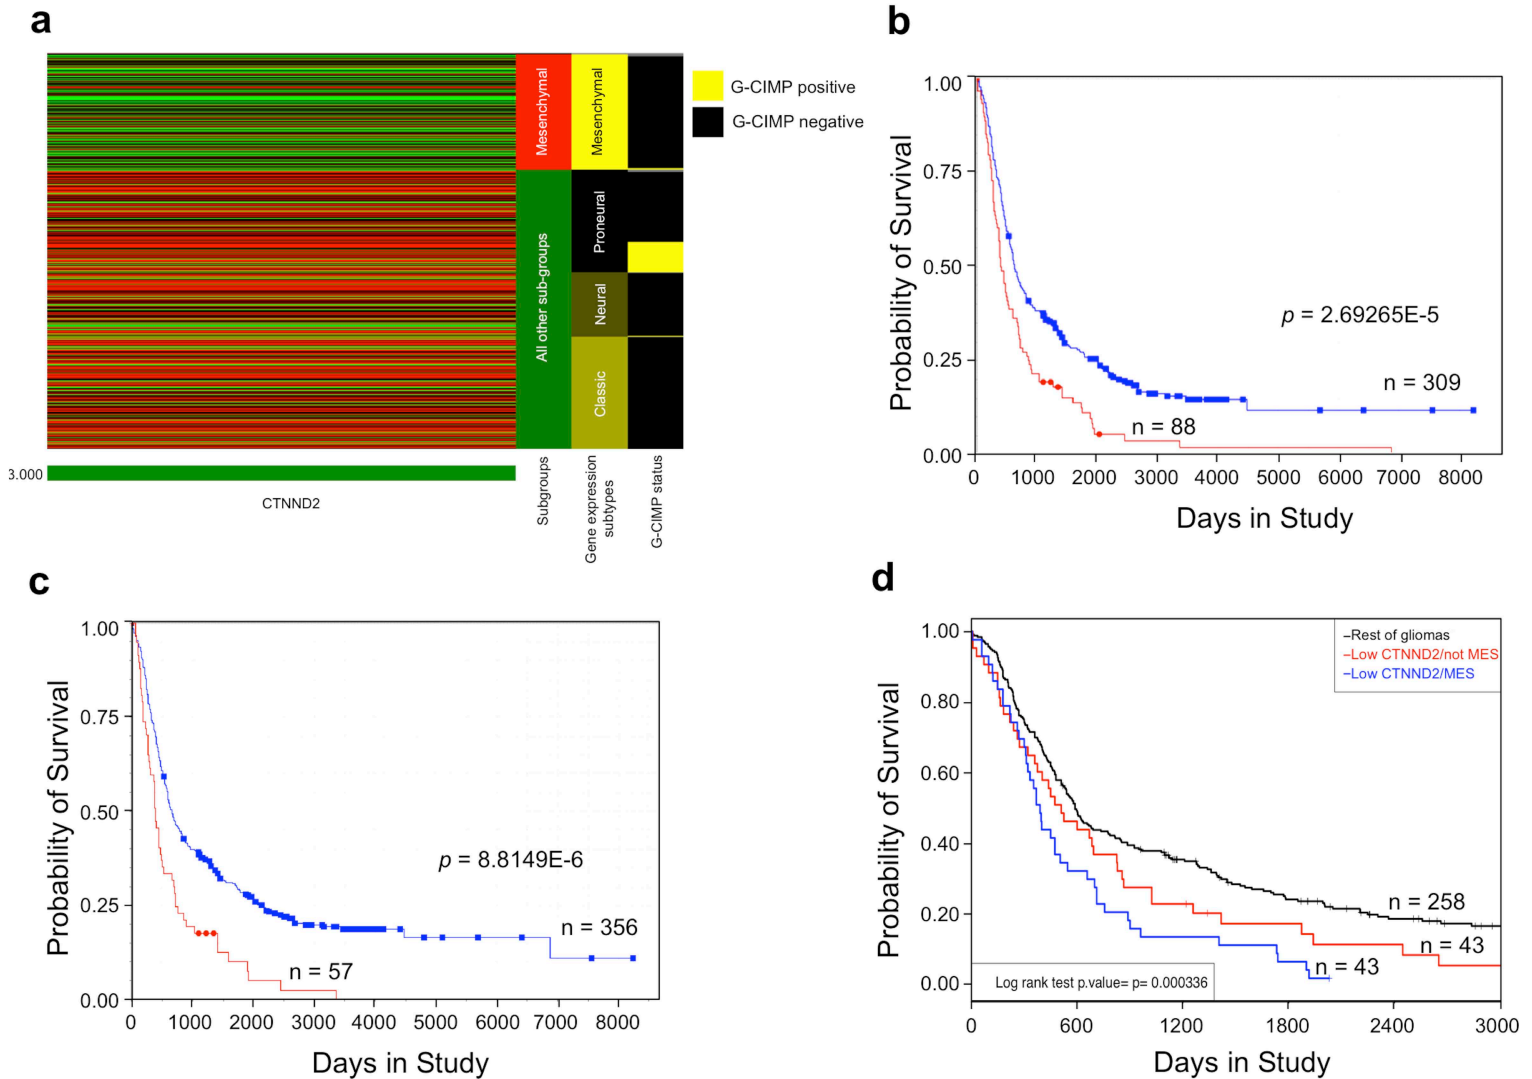

**Supplementary Figure 7.** a, *CTNND2* mRNA expression analysis from Atlas-TCGA samples shows that *CTNND2* is significantly down-regulated in the mesenchymal subgroup. In the green-red scale, black is the median, green is down-regulation and red is up-regulation. b, Kaplan–Meier analysis for glioma patients with low *CTNND2* mRNA expression ( $\leq 2$ -fold, red line) compared with the rest of glioma (blue line). c, Kaplan–Meier analysis for glioma patients with low *CTNND2* mRNA expression ( $\leq 2$ -fold) and decreased *CTNND2* gene copy number ( $\leq 1$ ) (red line) compared with the rest of glioma (blue line). d, Kaplan–Meier analysis for patients with mesenchymal (MES, blue line), non mesenchymal (non MES, red line) GBM with low *CTNND2* mRNA expression ( $\leq 2$ -fold) compared with the rest of gliomas (black line).

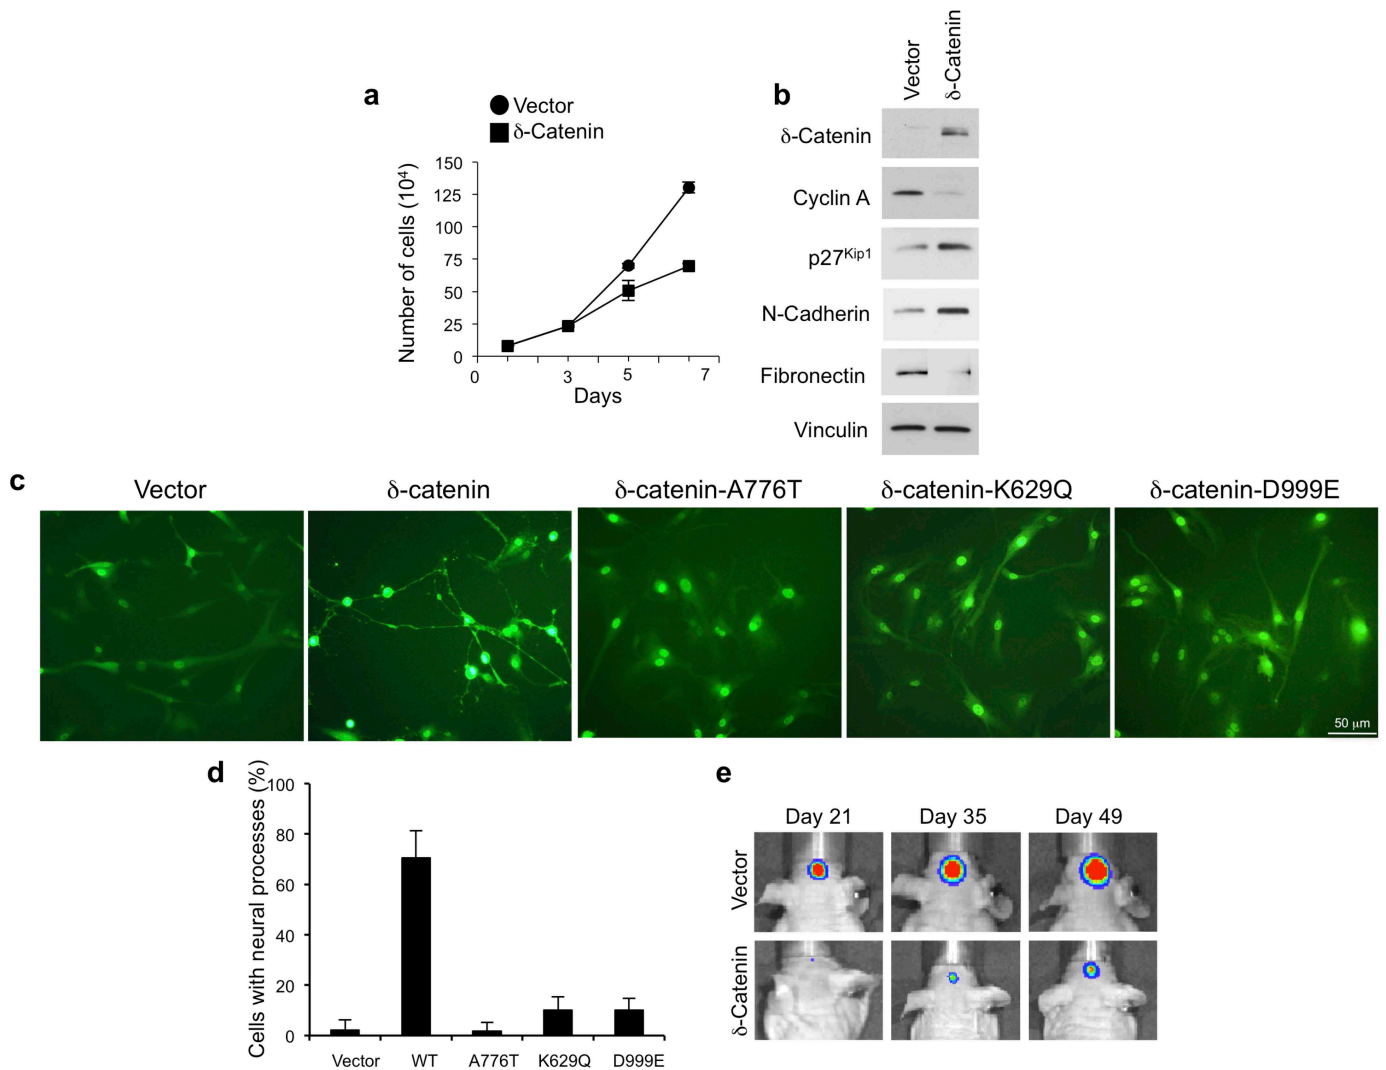

**Supplementary Figure 8.** Effects of expression of  $\delta$ -catenin in glioma cells. a, Growth rate of U87 glioma cells transduced with a lentivirus expressing  $\delta$ -catenin (squares) or the empty vector (circles, average of triplicate cultures). b, Western blot using the indicated antibodies in glioma cells expressing  $\delta$ -catenin or the empty vector. Vinculin is shown as control for loading. c, U87 glioma cells transduced with a lentivirus expressing wild type  $\delta$ -catenin,  $\delta$ -catenin GBM-derived mutants or the empty vector were analyzed by fluorescence microscopy. d, The number of cells displaying neural processes was scored. At least 200 cells/sample were analyzed. e, Photographs of longitudinal bioluminescence imaging for one representative mouse injected intracranially with glioma sphere cells #48 transduced with lentivirus expressing *CTNND2* (lower panels) or the empty vector (upper panels).

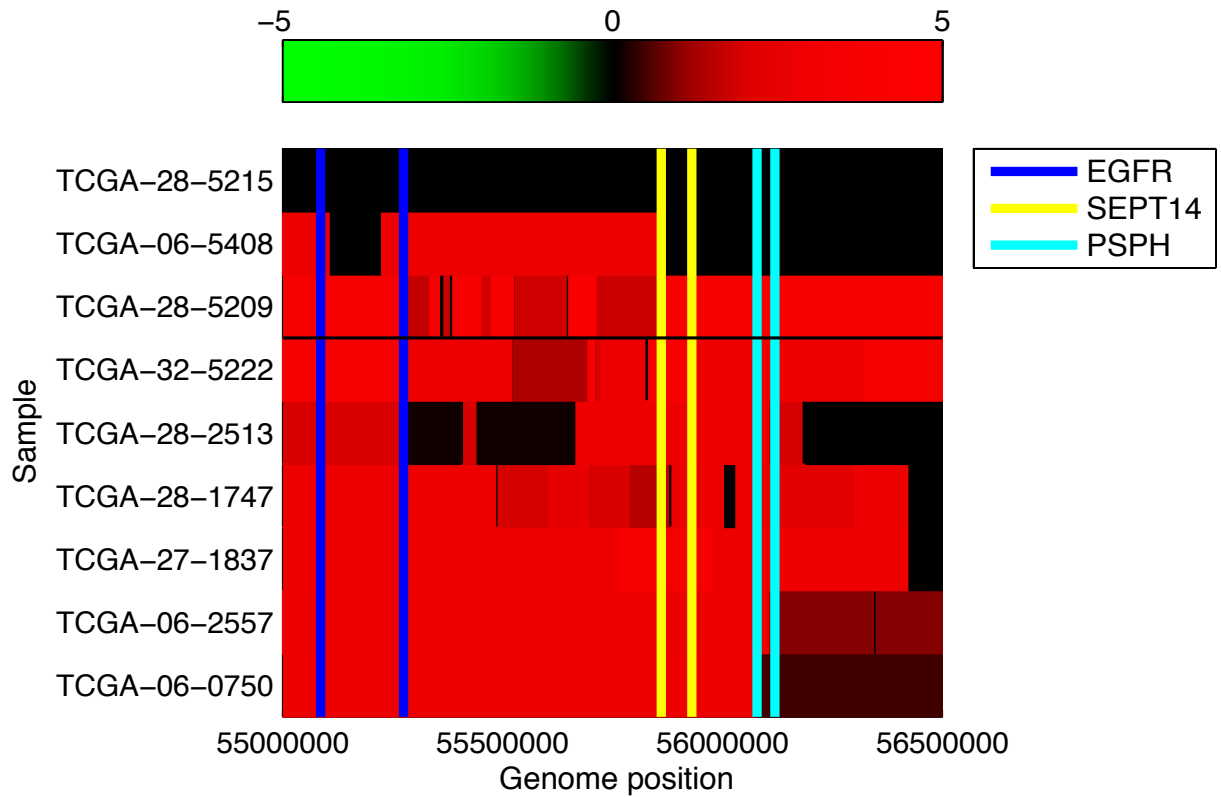

**Supplementary Figure 9.** Amplification surrounding the genomic neighborhood of EGFR, SEPT14, and PSPH among samples harboring EGFR fusions. We plot copy number log<sub>2</sub> ratio across the genomic region of chr7:55000000-56500000 for samples with EGFR-PSPH (top three rows) and EGFR-SEPT14 (bottom six rows). Genomic coordinates are also plotted for EGFR (blue), SEPT14 (yellow), and PSPH (cyan).

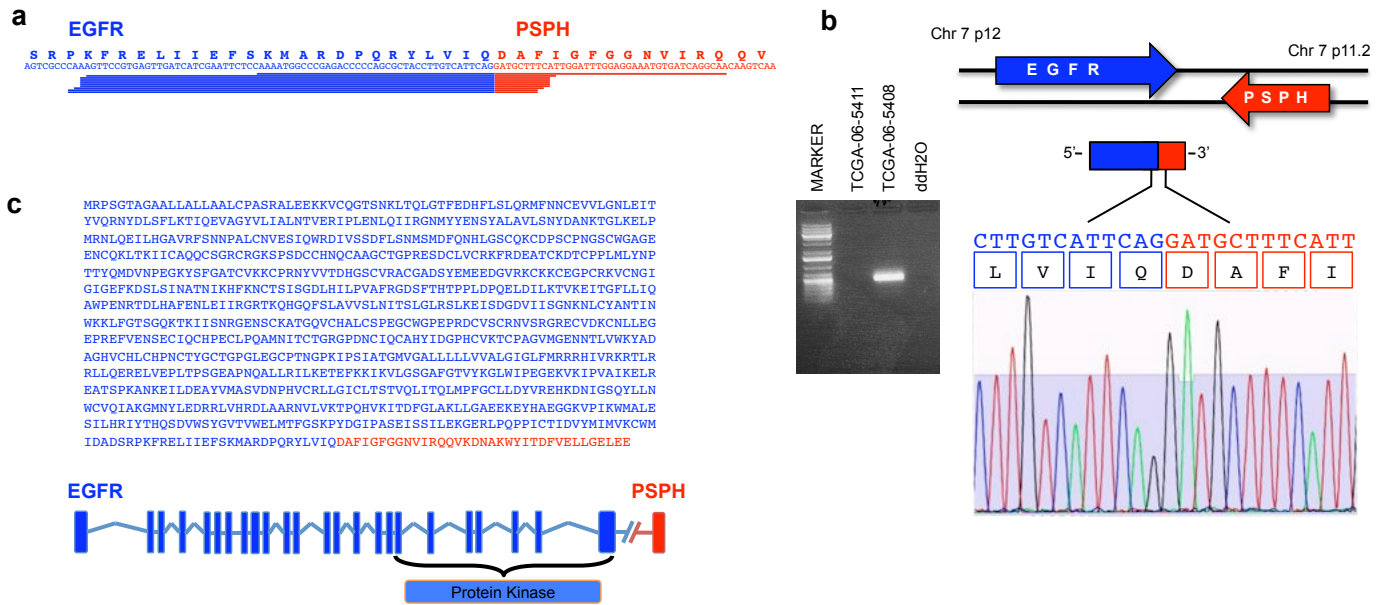

**Supplementary Figure 10.** *EGFR-PSPH* gene fusion identified by whole transcriptome sequencing. a, Split reads are shown aligning on the breakpoint. The predicted reading frame at the breakpoint is shown at the top with EGFR sequences in blue and PSPH in red. b, (left panel), *EGFR-PSPH* specific PCR from cDNA derived from GBMs. Marker, 1kb ladder. (right panel), Sanger sequencing chromatogram showing the reading frame at the breakpoint and putative translation of the fusion protein in the positive sample. c, *EGFR-PSPH* fusion protein sequence and schematics. Regions corresponding to EGFR and PSPH are shown in blue and red, respectively. The fusion includes the tyrosine kinase domain of EGFR and the last 35 amino acids of PSPH.

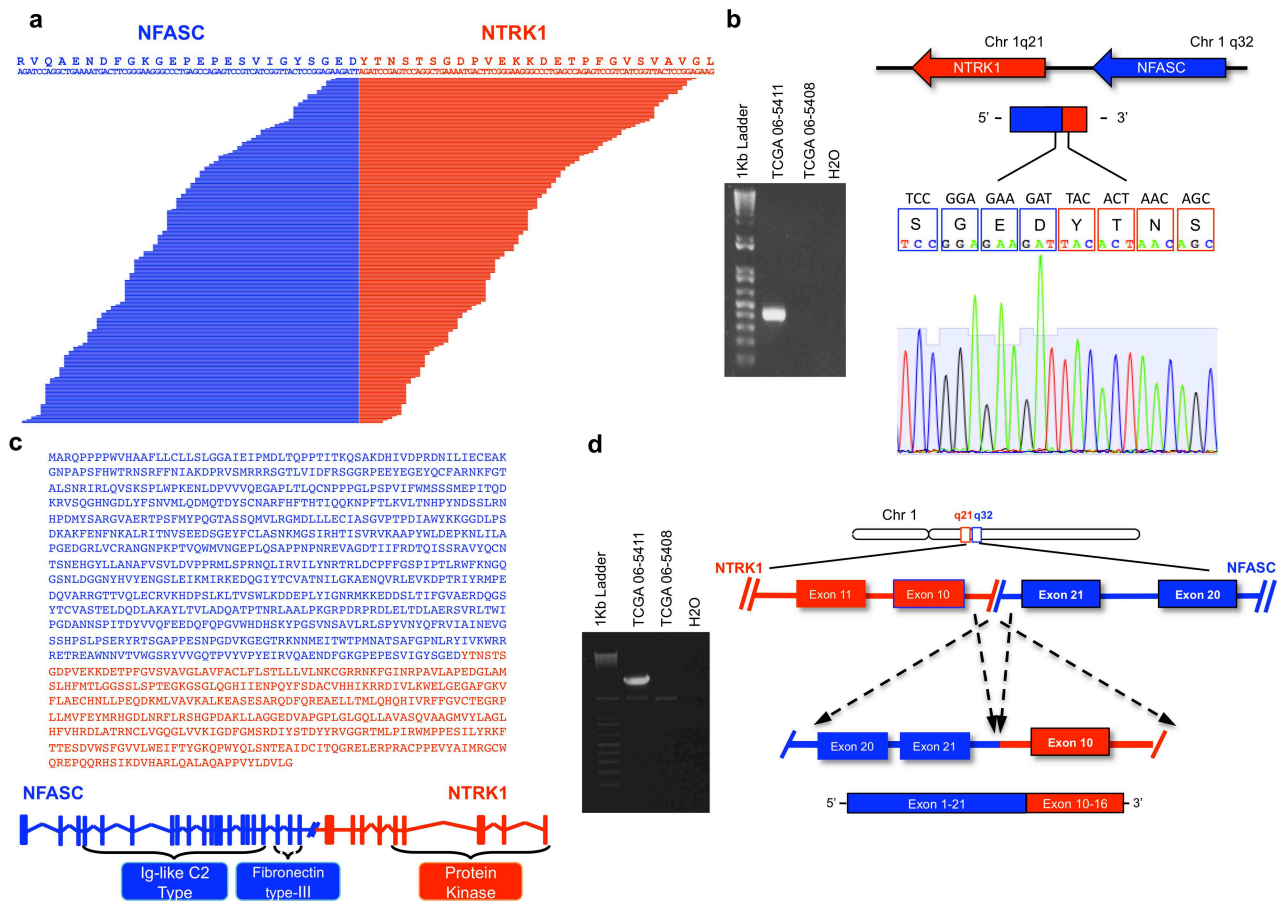

**Supplementary Figure 11. NFASC-NTRK1 gene fusion identified by whole transcriptome sequencing.** a, Split reads are shown aligning on the breakpoint. The predicted reading frame at the breakpoint is shown at the top with NFASC sequences in blue and NTRK1 in red. b, (left panel), NFASC-NTRK1 specific PCR from cDNA derived from GBMs. Marker, 1kb ladder. (right panel), Sanger sequencing chromatogram showing the reading frame at the breakpoint and putative translation of the fusion protein in the positive sample. c, NFASC-NTRK1 fusion protein sequence and schematics. Regions corresponding to NFASC and NTRK1 are shown in blue and red, respectively. The fusion includes two of the five fibronectin-type III domain of neurofascin and the protein kinase domain of NTRK1. d, Genomic fusion of NFASC intron 9 with intron 21 of NTRK1. In the fused mRNA exon 21 of NFASC is spliced 5' to exon 10 of NTRK1.

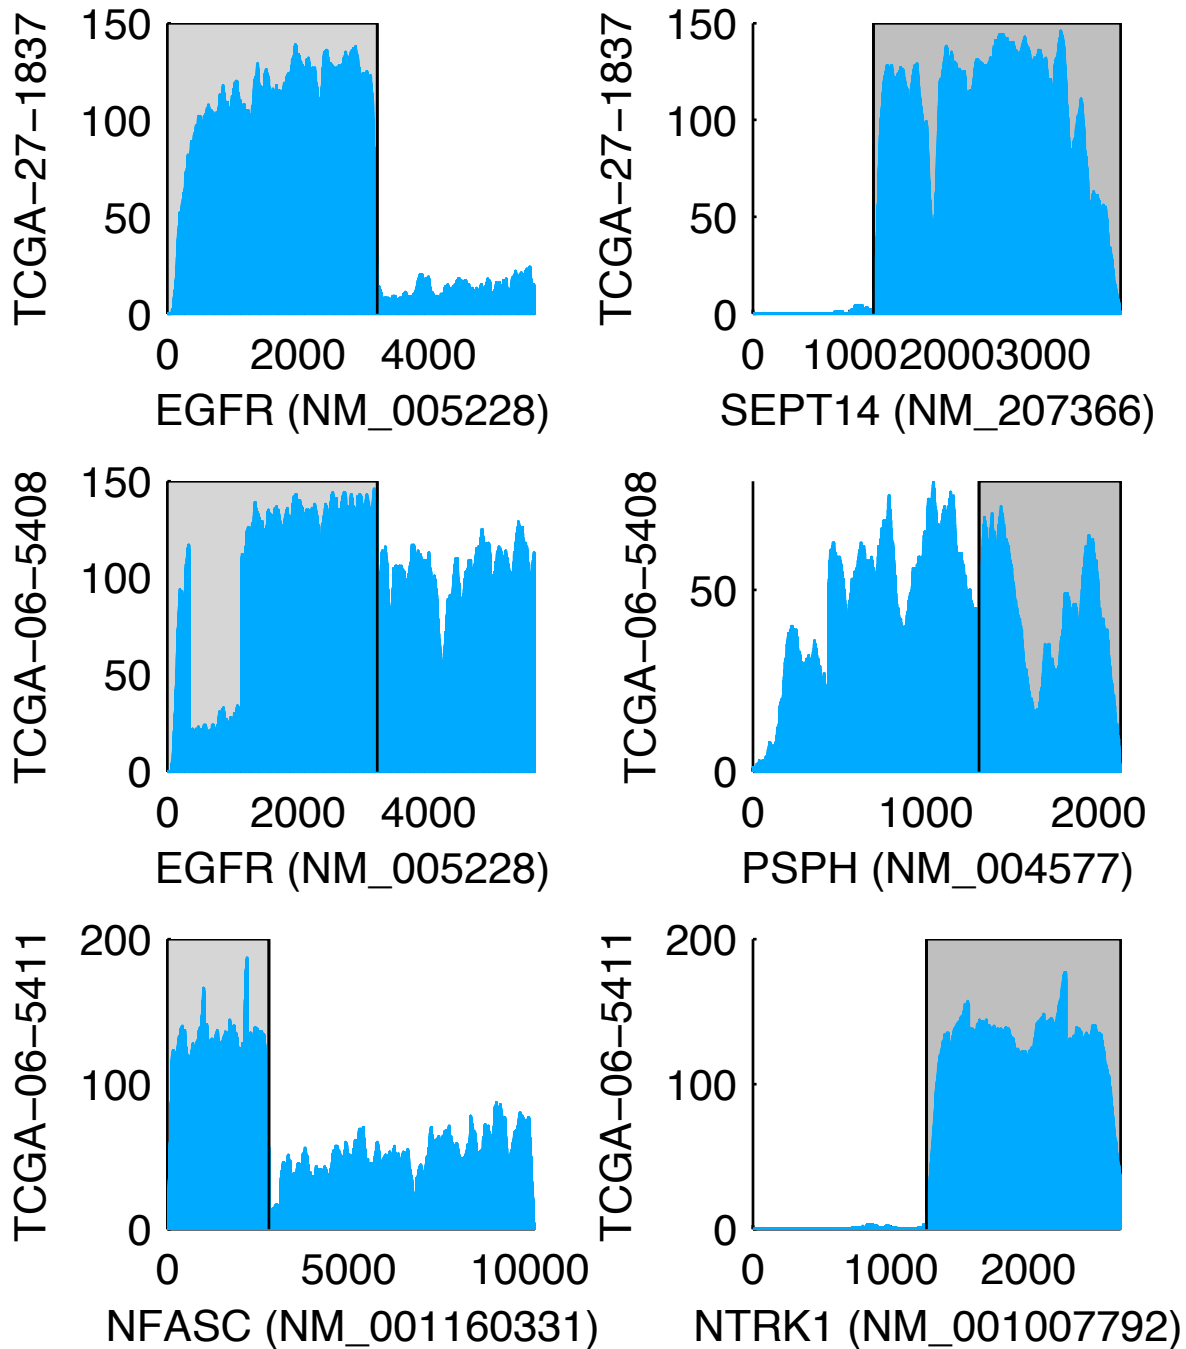

**Supplementary Figure 12.** Expression of three fusion genes measured by read depth from RNA-seq data. Note the very high level of expression in the regions of the genes implicated in the fusion events.

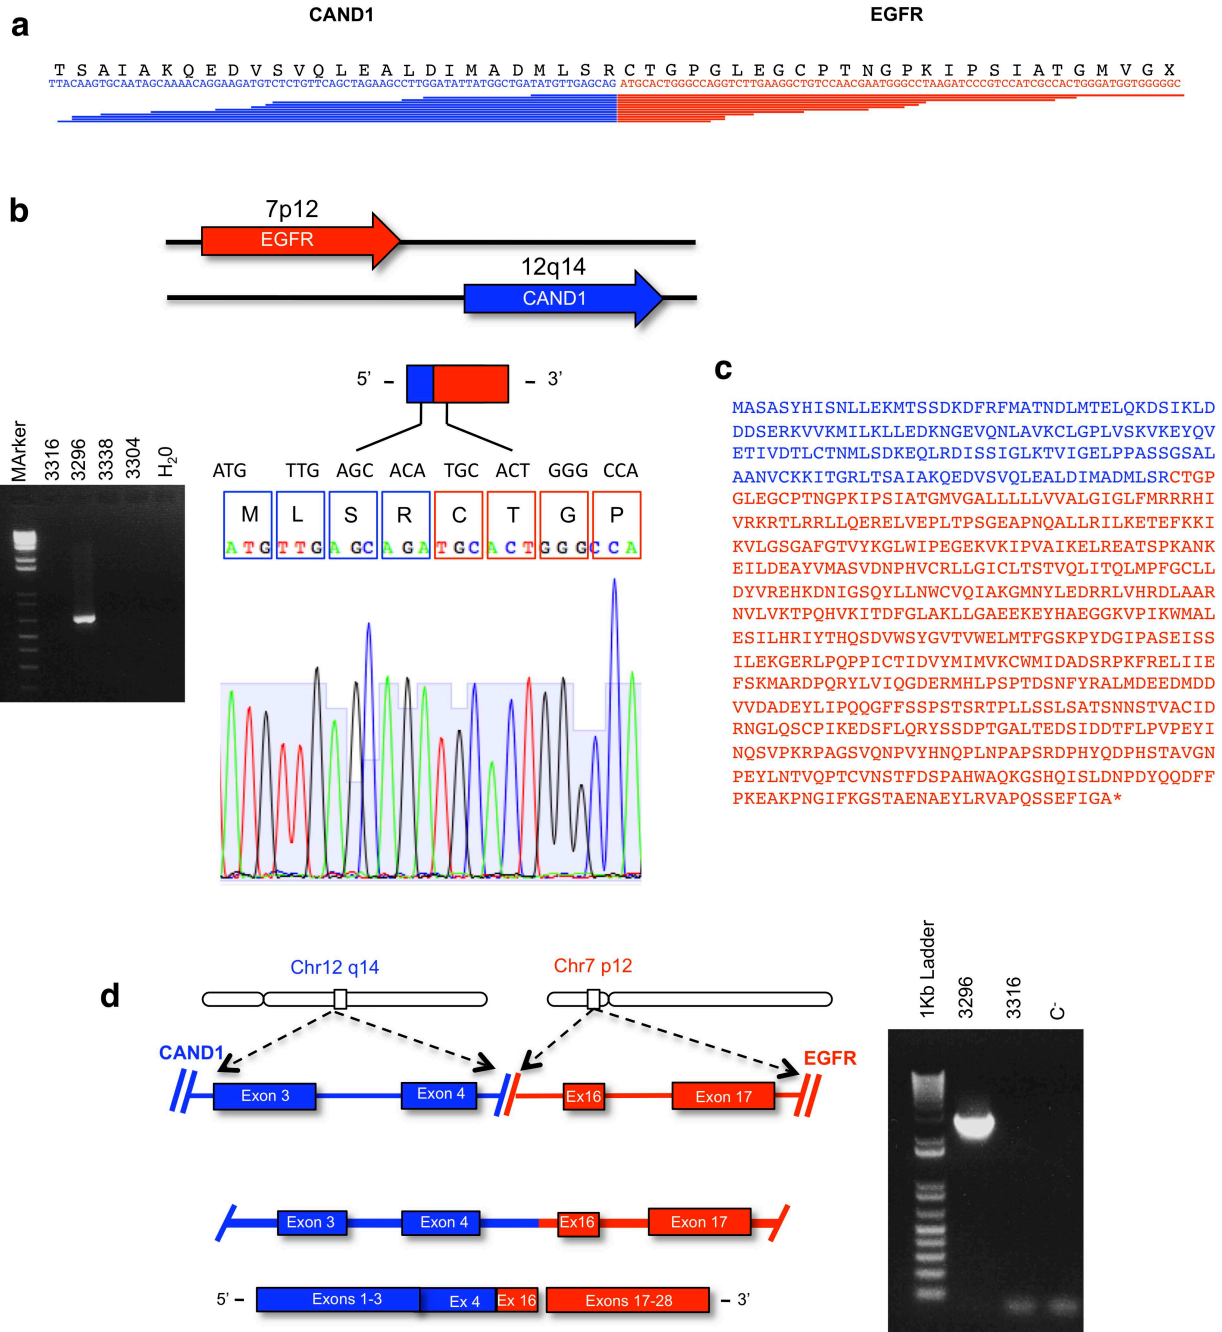

**Supplementary Figure 13.** CAND1-EGFR gene fusion identified by whole transcriptome sequencing. a, Split reads are shown aligning on the breakpoint. The predicted reading frame at the breakpoint is shown at the top with CAND1 sequences in blue and EGFR in red. b, (left panel), CAND1-EGFR specific PCR from cDNA derived from GBMs. Marker, 1kb ladder; (right panel), Sanger sequencing chromatogram showing the reading frame at the breakpoint and putative translation of the fusion protein in the positive sample. c, CAND1-EGFR fusion protein sequence. Regions corresponding to CAND1 and EGFR are shown in blue and red, respectively. d, Genomic fusion of CAND1 intron 4 with intron 15 of EGFR. In the fused mRNA exon 4 of CAND1 is spliced 5' to exon 16 of EGFR.

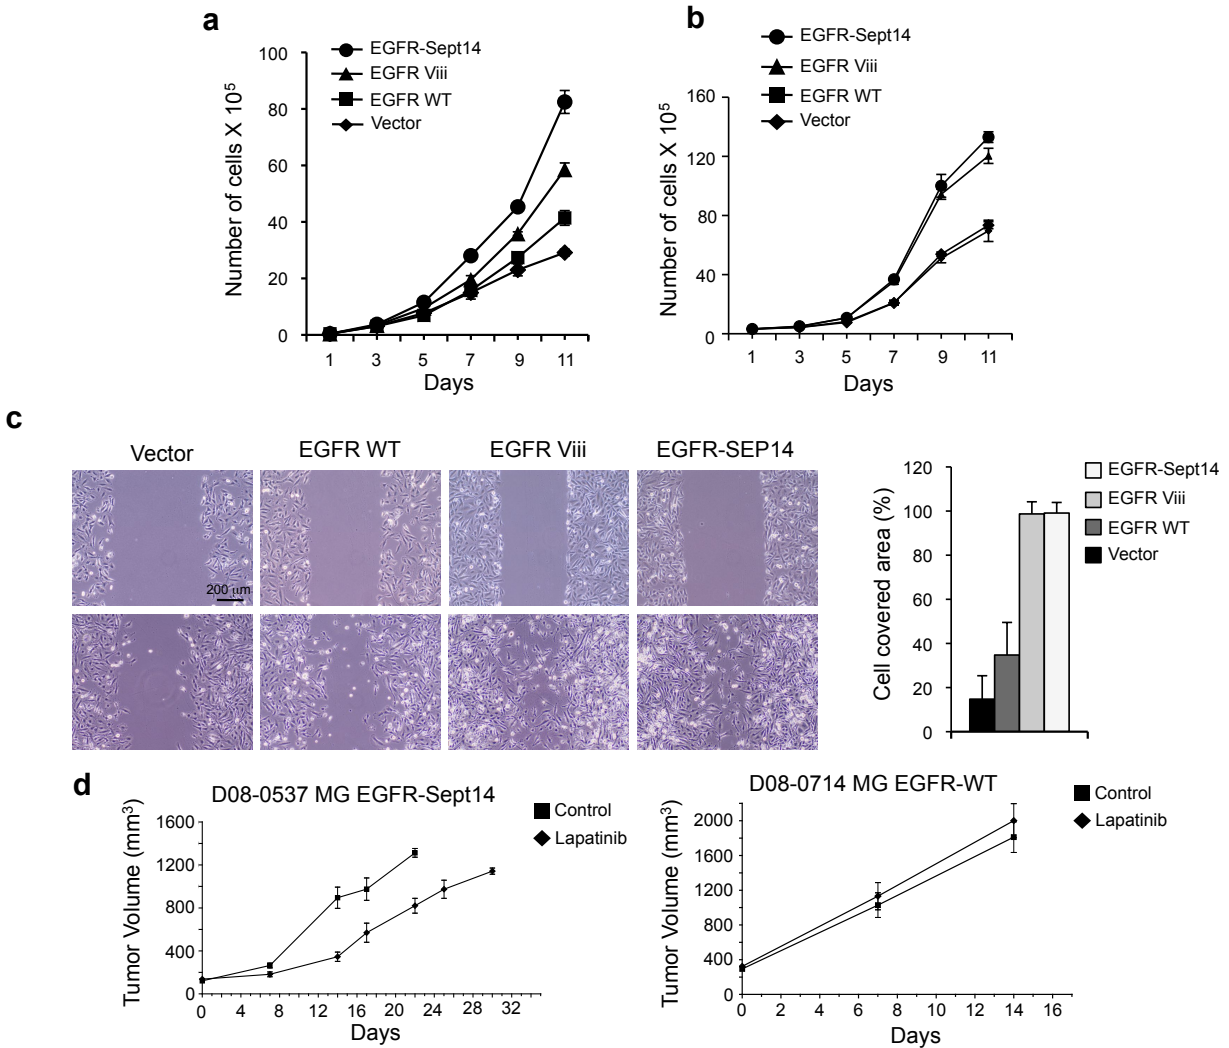

**Supplementary Figure 14.** Expression of *EGFR-SEPT14* fusion promotes an aggressive phenotype and inhibition of EGFR kinase delays GBM growth *in vivo*. a, Growth rate of U87 glioma cells transduced with a lentivirus expressing EGFR-SEPT14, EGFR VIII, EGFR WT or the empty vector (average of triplicate cultures). b, Growth rate of SNB19 glioma cells transduced with a lentivirus expressing EGFR-SEPT14, EGFR VIII, EGFR WT or the empty vector (average of triplicate cultures). c, (Left panels) Migration assay in SNB19 glioma cells transduced with a lentivirus expressing EGFR-SEPT14, EGFR VIII, EGFR WT or the empty vector. (Right panels) Quantification of the cell covered area (average of triplicate cultures). Error bars are SD. d, Kinetics of tumor growth for glioma patient-derived xenografts carrying the EGFR-SEPT14 fusion (D08-0537 MG, left panel) or wild type EGFR (D08-0714, right panel) treated with Lapatinib or vehicle (control). Error bars are SD.



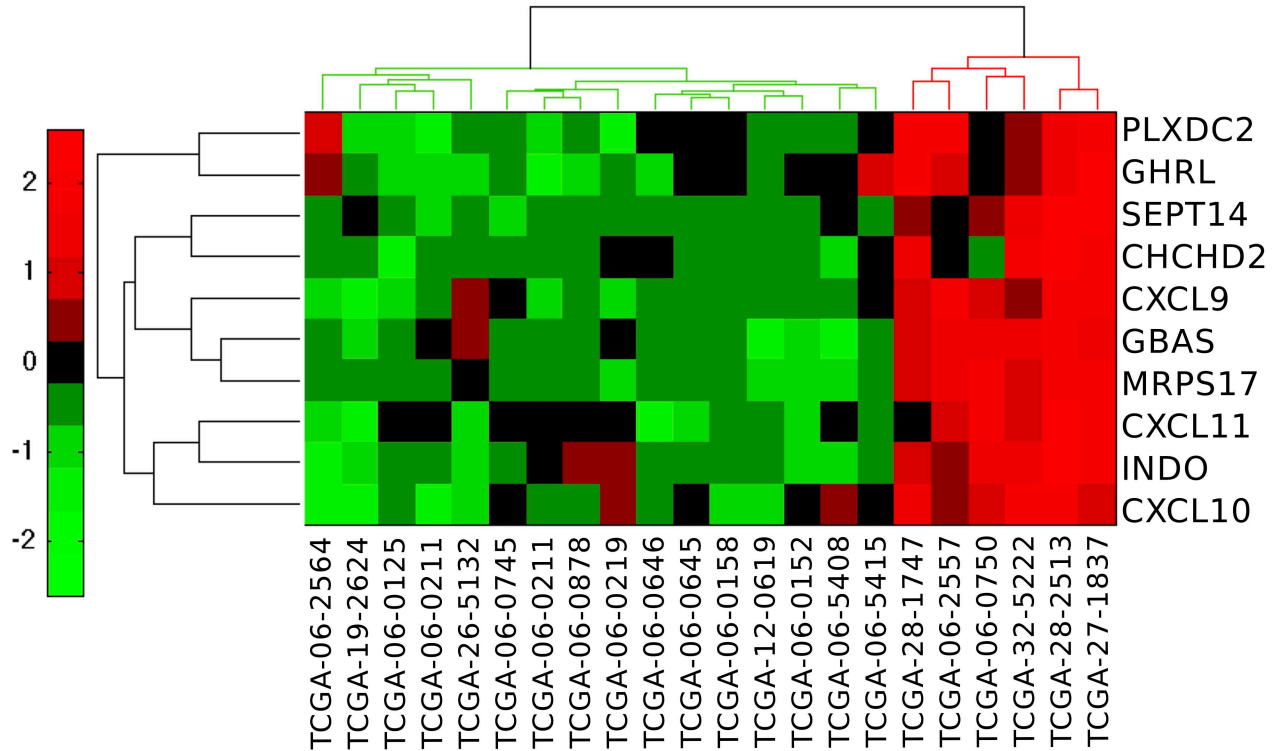

**Supplementary Figure 15.** Differential expression of GBM tumor samples harboring EGFR-SEPT14 fusions and EGFRvIII rearrangements. After filtering for statistical significance for differential expression, ten genes remained that characterized the EGFR-SEPT14 phenotype from the EGFRvIII phenotype. Log<sub>2</sub> expression was plotted as a heat map. Samples were hierarchically clustered by Euclidean distance using average linkage. This clustering demonstrates clear separation between EGFR-SEPT14 samples (red) and EGFRvIII samples (green), confirming the unique molecular signature of the EGFR-SEPT14 gene fusion.

**Supplementary Table 1.** Somatic point mutations from 139 whole exome data from TCGA, as predicted by SAVI. This item is presented separately as an Excel file. Annotation information in each column is described below:

|             |                                           |
|-------------|-------------------------------------------|
| case        | TCGA id                                   |
| tf          | tumor frequency                           |
| tf_lower    | tumor frequency lower bound               |
| tf_upper    | tumor frequency upper bound               |
| nf          | normal frequency                          |
| nf_lower    | normal frequency lower bound              |
| nf_upper    | normal frequency upper bound              |
| tf-nf       | frequency difference                      |
| tf-nf_lower | frequency difference lower bound          |
| tf-nf_upper | frequency difference upper bound          |
| t_qual      | quality of variants nucleotides in tumor  |
| t_vardepth  | tumor variant depth                       |
| t_totdepth  | tumor total depth                         |
| n_qual      | quality of variants nucleotides in normal |
| n_vardepth  | normal variant depth                      |
| n_totdepth  | normal total depth                        |
| chr:pos     | position                                  |
| ref/var     | reference/variant allele                  |
| gene        | gene                                      |
| CCDS        | CCDS                                      |
| sense       | sense                                     |
| exon_#      | exon number                               |
| codon       | condon                                    |
| AA          | amino acid                                |
| SNP         | SNP                                       |
| ref         | reference genome                          |
| cntxt       | context                                   |

**Supplementary Table 2.** List of mutations predicted by SAVI in the TCGA dataset and confirmed as somatic events (present in tumor DNA and absent in matched normal DNA) by Sanger sequencing. The mutations successfully validated by Sanger sequencing are highlighted in green, whereas those not validated by Sanger sequencing are highlighted in red.

| SAMPLES                         | GENE        | NTS VAR | aa VAR               |   |
|---------------------------------|-------------|---------|----------------------|---|
| <b>Non Synonymous Mutations</b> |             |         |                      |   |
| TCGA-06-0166                    | BCOR        | G/A     | R810*                | ✓ |
| TCGA-06-0140                    | BCOR        | T/A     | Y805F                | ✓ |
| TCGA-06-0171                    | BCOR        | A/C     | V1667G,V1649G,V1701G | × |
| TCGA-06-2559                    | BCOR        | C/T     | W1184*               | ✓ |
| TCGA-06-0188                    | BCORL1      | G/T     | E1685*               | ✓ |
| TCGA-06-0188                    | LZTR1       | C/T     | R810W                | ✓ |
| TCGA-06-2562                    | LZTR1       | T/C     | W105R                | ✓ |
| TCGA-06-5413                    | LZTR1       | G/A     | G248R                | ✓ |
| TCGA-06-2559                    | LRP2        | A/G     | L4130P               | ✓ |
| TCGA-06-0188                    | LRP2        | G/A     | R4165C               | ✓ |
| TCGA-06-0171                    | TRIML2      | C/A     | R265M                | ✓ |
| TCGA-27-1835                    | GPR116      | C/T     | A1176T               | ✓ |
| TCGA-27-1835                    | PTPRT       | G/A     | R364*                | ✓ |
| TCGA-06-0140                    | PTPRT       | C/T     | V424M                | ✓ |
| TCGA-06-2559                    | PCDH11X     | G/A     | R518H                | ✓ |
| TCGA-06-0171                    | PKHD1       | G/A     | L1989F               | ✓ |
| TCGA-06-5413                    | FAT2        | G/A     | R411*                | ✓ |
| TCGA-27-1835                    | GABRA6      | C/A     | T147N                | ✓ |
| TCGA-06-2562                    | CTNND2      | C/T     | A71T                 | ✓ |
| TCGA-06-2559                    | HERC2       | A/C     | S895A                | × |
| TCGA-06-2562                    | PALM2-AKAP2 | C/T     | R150*                | ✓ |
| TCGA-06-0171                    | HLTF        | G/C     | S29*                 | ✓ |
| TCGA-06-2559                    | MAPK1       | G/A     | L244F                | ✓ |
| TCGA-06-0188                    | TACR3       | C/T     | V403M                | ✓ |
| TCGA-27-1835                    | SYT9        | C/T     | R215W                | ✓ |
| TCGA-06-0188                    | PTPRB       | T/G     | R592S-R374S          | ✓ |
| TCGA-06-2559                    | AOX1        | C/T     | A507V                | ✓ |
| TCGA-27-1835                    | MDN1        | C/-     | T5272-               | ✓ |
| TCGA-06-0188                    | TMPRSS11A   | G/-     | Y318-,Y315-          | ✓ |
| TCGA-27-1835                    | IFT172      | C/A     | R1483S               | ✓ |
| TCGA-06-2562                    | ITGAX       | G/A     | R685H                | ✓ |
| TCGA-06-5413                    | AKAP1       | T/A     | S690T                | ✓ |
| TCGA-06-0171                    | CAMK2A      | G/A     | A384A-A395A          | ✓ |
| TCGA-27-1835                    | KIAA1804    | C/T     | R760*                | ✓ |

|                             |        |     |       |   |
|-----------------------------|--------|-----|-------|---|
| TCGA-06-5413                | HDLBP  | T/C | I127V | ✓ |
| TCGA-06-2562                | PIGR   | C/T | V558I | ✓ |
| TCGA-06-2562                | GAK    | C/T | V709V | ✓ |
| TCGA-06-2559                | SCNN1G | C/A | F531L | ✓ |
| <b>Synonymous Mutations</b> |        |     |       |   |
| TCGA-06-0188                | AKNA   | C/T | R551R | ✓ |
| TCGA-27-1835                | MAGEC2 | C/T | L61L  | ✓ |
| TCGA-06-2562                | RNF43  | T/G | R600S | ✓ |

**Supplementary Table 3.** List of genes mutated in GBM ranked by enrichment of non-synonymous mutations over synonymous. This item is presented separately as an Excel file.

**Supplementary Table 4.** List of 67 genes prioritized by MutComFocal. In column C the gene names are highlighted in green (previously known GBM genes), red (new GBM genes, somatic mutations validated in independent GBM dataset) or blue (new GBM genes, somatic mutations not validated in independent GBM dataset). Annotation information in each column is described below:

|                |                                  |
|----------------|----------------------------------|
| region         | region index                     |
| type           | type of the alteration           |
| gene           | gene                             |
| chr            | chromosome                       |
| start          | start of gene                    |
| end            | end of gene                      |
| amp_mut_rank   | amp-mut rank                     |
| amp_mut_tier   | amp-mut tier                     |
| amp_freq       | amplification frequency          |
|                | number of genes in smallest      |
| amp_min1_genes | amplification                    |
| del_mut_rank   | Del-Mut rank                     |
| del_mut_tier   | Del-Mut tier                     |
| del_freq       | deletion frequency               |
|                | number of genes in smallest      |
| del_min1_genes | deletion                         |
| mut_rank       | mut rank                         |
| mut_freq       | mutation frequency               |
| has_stop       | does it have a nonsense mutation |

| region | type        | gene       | chr | start | end       | amp_mut_ra | amp_mut_tic | amp_freq | amp_min1_g | del_mut_ran | del_mut_tier | del_freq | del_min1_ge | mut_rank | mut_freq | has_stop |   |
|--------|-------------|------------|-----|-------|-----------|------------|-------------|----------|------------|-------------|--------------|----------|-------------|----------|----------|----------|---|
|        | 225 del_mut | ADAMTS16   |     | 5     | 5193442   | 5373412    | 802         | 7        | 4.7        | 70          | 166          | 3        | 6           | 2        | 316      | 2.9      | 0 |
|        | 768 del_mut | ADAMTS18   |     | 16    | 75873525  | 76026512   | 903         | 7        | 2.8        | 6           | 190          | 3        | 11.5        | 6        | 725      | 2.2      | 0 |
|        | 149 del_mut | ADCY5      |     | 3     | 124486088 | 124650082  | 1022        | 7        | 4.1        | 7           | 167          | 3        | 6.8         | 1        | 441      | 2.2      | 0 |
|        | 106 mut_1   | AOX1       |     | 2     | 201158975 | 201244462  | 1418        | 8        | 2.6        | 53          | 1880         | 8        | 0.9         | 18       | 140      | 2.9      | 0 |
|        | 966 del_mut | ATRX       | X   |       | 76647011  | 76928375   | 379         | 6        | 7.2        | 35          | 112          | 3        | 14.9        | 5        | 45       | 2.9      | 1 |
|        | 936 del_mut | BCOR       | X   |       | 39795442  | 39921526   | 681         | 7        | 7          | 165         | 50           | 3        | 14.9        | 1        | 454      | 3.7      | 2 |
|        | 427 amp_mut | BRAF       |     | 7     | 140080281 | 140271033  | 27          | 3        | 74.4       | 1           | 2104         | 9        | 0.9         | 5        | 162      | 0.7      | 0 |
|        | 59 mut_1    | CACNA1S    |     | 1     | 199275262 | 199348317  | 158         | 5        | 9.2        | 4           | 1450         | 7        | 1.3         | 22       | 143      | 2.9      | 0 |
|        | 57 amp_mut  | CFHR4      |     | 1     | 195123834 | 195154386  | 49          | 3        | 9.2        | 1           | 4396         | 26       | 0           | 0        | 19       | 2.2      | 0 |
|        | 457 del_mut | COL22A1    |     | 8     | 139669659 | 139995418  | 301         | 6        | 6          | 3           | 158          | 3        | 4.7         | 1        | 137      | 2.2      | 0 |
|        | 117 mut_1   | COL6A3     |     | 2     | 237897393 | 237987589  | 1961        | 10       | 1.9        | 86          | 1094         | 6        | 3           | 6        | 1037     | 3.7      | 1 |
|        | 229 del_mut | CTNND2     |     | 5     | 11024951  | 11957110   | 507         | 6        | 5.1        | 70          | 82           | 3        | 4.7         | 1        | 39       | 2.2      | 0 |
|        | 610 amp_mut | DDIT3      |     | 12    | 56196637  | 56200567   | 11          | 3        | 13.6       | 2           | 1022         | 6        | 6.4         | 5        | 293      | 0.7      | 0 |
|        | 53 mut_1    | DDR2       |     | 1     | 160868851 | 161016871  | 894         | 7        | 8.5        | 57          | 1473         | 7        | 0.9         | 3        | 506      | 2.9      | 0 |
|        | 932 del_mut | DMD        | X   |       | 31047265  | 33267647   | 609         | 6        | 7          | 165         | 7            | 2        | 17.1        | 1        | 277      | 2.2      | 0 |
|        | 91 del_mut  | DPP10      |     | 2     | 114916368 | 116318406  | 473         | 6        | 2.8        | 2           | 135          | 3        | 2.3         | 1        | 12       | 2.2      | 1 |
|        | 272 del_mut | DSP        |     | 6     | 7486868   | 7531945    | 1507        | 9        | 1.1        | 69          | 162          | 3        | 9           | 1        | 26       | 2.2      | 0 |
|        | 389 amp_mut | EGFR       |     | 7     | 55054218  | 55242525   | 1           | 1        | 71         | 1           | 1788         | 8        | 1.1         | 1        | 2        | 15.4     | 0 |
|        | 54 mut_1    | F5         |     | 1     | 167747815 | 167822393  | 292         | 5        | 8.5        | 13          | 1652         | 7        | 1.3         | 24       | 51       | 2.9      | 1 |
|        | 93 mut_1    | FAM123C    |     | 2     | 131229546 | 131242177  | 713         | 7        | 2.8        | 2           | 1308         | 6        | 1.5         | 11       | 255      | 2.9      | 0 |
|        | 250 mut_1   | FAT2       |     | 5     | 150863845 | 150928698  | 1274        | 8        | 3.2        | 73          | 838          | 5        | 4.5         | 5        | 77       | 4.4      | 1 |
|        | 252 mut_1   | GABRA6     |     | 5     | 161045235 | 161062176  | 908         | 7        | 3.2        | 1           | 899          | 5        | 4.5         | 54       | 41       | 2.9      | 0 |
|        | 288 mut_1   | GPR116     |     | 6     | 46928203  | 47030634   | 1997        | 10       | 1.1        | 256         | 1044         | 6        | 7.7         | 14       | 392      | 2.9      | 0 |
|        | 237 del_mut | HCN1       |     | 5     | 45295108  | 45731977   | 892         | 7        | 4.5        | 38          | 214          | 3        | 3.2         | 1        | 119      | 3.7      | 1 |
|        | 672 del_mut | HERC2      |     | 15    | 26029782  | 26240890   | 1999        | 10       | 0.6        | 24          | 109          | 3        | 15.1        | 1        | 234      | 2.2      | 0 |
|        | 108 mut_1   | IDH1       |     | 2     | 208809197 | 208828051  | 279         | 5        | 2.8        | 6           | 874          | 5        | 0.9         | 179      | 9        | 7.4      | 0 |
|        | 188 amp_mut | KIT        |     | 4     | 55218851  | 55301638   | 13          | 3        | 11.7       | 2           | 1929         | 8        | 3           | 5        | 2206     | 0.7      | 0 |
|        | 47 mut_1    | KPRP       |     | 1     | 150997129 | 151001153  | 267         | 5        | 9.2        | 10          | 1047         | 6        | 0.6         | 10       | 1172     | 2.9      | 0 |
|        | 916 mut_1   | KRTAP10-11 |     | 21    | 44890758  | 44891994   | 20563       | 27       | 6.2        | 67          | 20562        | 26       | 4.5         | 40       | 20569    | 2.9      | 0 |
|        | 636 del_mut | LRFN5      |     | 14    | 41146513  | 41443504   | 406         | 6        | 1.1        | 1           | 15           | 2        | 24.7        | 1        | 124      | 2.9      | 0 |
|        | 97 del_mut  | LRP1B      |     | 2     | 140705465 | 142605740  | 1582        | 9        | 2.3        | 15          | 19           | 2        | 6           | 1        | 421      | 2.2      | 1 |
|        | 101 mut_1   | LRP2       |     | 2     | 169691864 | 169927368  | 1144        | 8        | 3          | 133         | 1718         | 7        | 1.1         | 139      | 47       | 4.4      | 0 |
|        | 918 del_mut | LZTR1      |     | 22    | 19666557  | 19683326   | 1419        | 8        | 1.7        | 83          | 86           | 3        | 22.4        | 4        | 30       | 4.4      | 1 |
|        | 60 amp_mut  | MDM4       |     | 1     | 202752133 | 202793870  | 4           | 2        | 17.3       | 5           | 2001         | 8        | 0.6         | 39       | 192      | 0.7      | 0 |
|        | 923 del_mut | MXRA5      | X   |       | 3236607   | 3274684    | 290         | 5        | 6.6        | 6           | 65           | 3        | 15.1        | 1        | 220      | 2.9      | 0 |
|        | 84 amp_mut  | MYCN       |     | 2     | 15998133  | 16004580   | 25          | 3        | 4.9        | 2           | 1773         | 8        | 2.1         | 60       | 905      | 0.7      | 0 |
|        | 808 del_mut | NF1        |     | 17    | 26446070  | 26728820   | 2063        | 10       | 1.5        | 43          | 84           | 3        | 8.3         | 1        | 1536     | 2.2      | 1 |
|        | 625 mut_1   | NOS1       |     | 12    | 116135361 | 116283965  | 725         | 7        | 4.3        | 12          | 1004         | 6        | 4.9         | 18       | 36       | 3.7      | 0 |
|        | 982 del_mut | ODZ1       | X   |       | 123337436 | 123925347  | 755         | 7        | 6.8        | 10          | 75           | 3        | 14.5        | 1        | 650      | 2.2      | 0 |
|        | 966 del_mut | PCDH11X    | X   |       | 90920915  | 91764878   | 177         | 5        | 4.9        | 1           | 1            | 1        | 35          | 1        | 50       | 2.9      | 0 |
|        | 648 del_mut | PCNX       |     | 14    | 70443874  | 70651852   | 2298        | 12       | 1.1        | 28          | 228          | 4        | 24.5        | 1        | 952      | 2.2      | 1 |
|        | 188 amp_mut | PDGFRA     |     | 4     | 54790020  | 54859169   | 2           | 2        | 14.3       | 2           | 1430         | 7        | 2.6         | 19       | 314      | 2.9      | 0 |
|        | 60 amp_mut  | PIK3C2B    |     | 1     | 202658380 | 202726097  | 8           | 2        | 17.1       | 5           | 2051         | 9        | 0.6         | 1        | 729      | 0.7      | 0 |
|        | 160 amp_mut | PIK3CA     |     | 3     | 180349004 | 180435191  | 51          | 3        | 9.6        | 4           | 737          | 5        | 1.5         | 2        | 13       | 5.9      | 1 |
|        | 239 del_mut | PIK3R1     |     | 5     | 67558217  | 67633405   | 442         | 6        | 4.3        | 12          | 67           | 3        | 3.8         | 1        | 16       | 5.1      | 0 |
|        | 919 del_mut | PIWIL3     |     | 22    | 23445000  | 23500683   | 2001        | 10       | 1.5        | 21          | 165          | 3        | 24.5        | 9        | 554      | 2.2      | 1 |

|               |         |    |           |           |      |    |      |      |      |   |      |     |      |     |   |
|---------------|---------|----|-----------|-----------|------|----|------|------|------|---|------|-----|------|-----|---|
| 921 del_mut   | PKDREJ  | 22 | 45030223  | 45037883  | 2362 | 12 | 1.3  | 97   | 170  | 3 | 28.6 | 8   | 596  | 2.9 | 0 |
| 291 del_mut   | PKHD1   | 6  | 51588103  | 52060382  | 1465 | 9  | 1.3  | 256  | 103  | 3 | 7.7  | 1   | 34   | 4.4 | 0 |
| 105 del_mut   | PLCL1   | 2  | 198377670 | 198722851 | 1691 | 9  | 2.8  | 53   | 203  | 3 | 1.5  | 1   | 722  | 2.2 | 1 |
| 152 mut_1     | PPP2R3A | 3  | 137167256 | 137349423 | 1317 | 8  | 4.7  | 176  | 1409 | 7 | 4.9  | 3   | 1270 | 2.9 | 1 |
| 747 del_mut   | PRKCB   | 16 | 23754800  | 24139431  | 1741 | 9  | 2.3  | 219  | 191  | 3 | 9.2  | 1   | 146  | 2.2 | 0 |
| 504 del_mut   | PTEN    | 10 | 89613174  | 89718512  | 1915 | 10 | 0.4  | 239  | 2    | 1 | 82.7 | 1   | 18   | 8.8 | 4 |
| 898 del_mut   | PTPRT   | 20 | 40134805  | 41251971  | 249  | 5  | 27.7 | 100  | 226  | 4 | 2.6  | 1   | 93   | 2.9 | 1 |
| 633 del_mut   | RB1     | 13 | 47775883  | 47954027  | 2540 | 14 | 0.4  | 111  | 14   | 2 | 36   | 1   | 636  | 3.7 | 4 |
| 454 mut_1     | RIMS2   | 8  | 104582151 | 105334627 | 852  | 7  | 5.3  | 63   | 1437 | 7 | 3.2  | 1   | 406  | 4.4 | 3 |
| 75 amp_mut    | SDCCAG8 | 1  | 241485942 | 241730016 | 30   | 3  | 10.9 | 3    | 1055 | 6 | 1.3  | 4   | 190  | 0.7 | 0 |
| 254 mut_1     | SLIT3   | 5  | 168025648 | 168660711 | 1277 | 8  | 3.4  | 34   | 983  | 5 | 4.5  | 2   | 698  | 2.9 | 0 |
| 999 del_mut   | SLITRK4 | X  | 142543607 | 142550685 | 619  | 7  | 7    | 1092 | 138  | 3 | 14.7 | 1   | 329  | 2.2 | 0 |
| 353 del_mut   | SNX9    | 6  | 158164281 | 158286097 | 1098 | 8  | 2.1  | 7    | 200  | 3 | 19.4 | 3   | 211  | 2.2 | 0 |
| 50 mut_1      | SPTA1   | 1  | 156847119 | 156923130 | 464  | 6  | 9    | 30   | 1700 | 7 | 0.4  | 113 | 23   | 6.6 | 2 |
| 351 del_mut   | SYNE1   | 6  | 152484514 | 153000227 | 1347 | 8  | 1.9  | 58   | 30   | 2 | 19   | 2   | 46   | 3.7 | 0 |
| 460 del_mut   | TEK     | 9  | 27099146  | 27220172  | 304  | 6  | 2.8  | 1    | 5    | 2 | 43.5 | 1   | 86   | 2.2 | 0 |
| 920 del_mut   | TMPRSS6 | 22 | 35791424  | 35829639  | 2156 | 11 | 1.3  | 119  | 163  | 3 | 26.9 | 4   | 94   | 2.2 | 1 |
| 796 del_mut   | TP53    | 17 | 7512444   | 7531588   | 449  | 6  | 0.6  | 26   | 4    | 2 | 10.2 | 1   | 1    | 25  | 2 |
| 217 del_mut   | TRIML1  | 4  | 189297591 | 189305643 | 330  | 6  | 1.7  | 3    | 87   | 3 | 7    | 1   | 35   | 2.9 | 0 |
| 453 mut_1     | TRPA1   | 8  | 73096039  | 73150373  | 591  | 6  | 4.7  | 107  | 786  | 5 | 4.1  | 3   | 29   | 3.7 | 1 |
| 901 amp_mut_1 | TSHZ2   | 20 | 51022283  | 51537372  | 246  | 5  | 27.3 | 8    | 1267 | 6 | 2.1  | 1   | 98   | 2.2 | 0 |



**Supplementary Table 5.** Somatic point mutations identified in 18 novel GBM genes from an independent dataset of 83 GBM samples and matched normal DNA. Each mutation reported in this list has been confirmed as present in the corresponding tumor DNA and absent in the matched normal DNA by Sanger sequencing.

| SAMPLE      | CHR   | POS       | REF | ALT | N DEPTH | N FREQ | T DEPTH | T FREQ | SomaticSc | MBH:Gene | MBF:Mutation Typ  | MBF:Protein Mutation |
|-------------|-------|-----------|-----|-----|---------|--------|---------|--------|-----------|----------|-------------------|----------------------|
| D-3469-T    | chr1  | 6186732   | G   | C   | 660     | 0.3%   | 433     | 33.5%  | 225       | CHD5     | Missense          | p.H1326Q             |
| D-10-0001-T | chr1  | 6202556   | C   | T   | 493     | 0.0%   | 413     | 29.5%  | 225       | CHD5     | Missense          | p.G718D              |
| CG-3572     | chr1  | 215844367 | A   | T   | 574     | 0.3%   | 604     | 32.6%  | 225       | USH2A    | Missense          | p.S4694T             |
| CG-3560     | chr1  | 216052409 | C   | T   | 254     | 0.4%   | 271     | 17.3%  | 69        | USH2A    | Missense          | p.G2752E             |
| CG-3609     | chr1  | 216173785 | G   | A   | 530     | 0.0%   | 347     | 17.0%  | 117       | USH2A    | Missense          | p.P2149S             |
| CG-3609     | chr1  | 216243499 | C   | T   | 546     | 0.5%   | 356     | 16.3%  | 76        | USH2A    | Missense          | p.R1998H             |
| CG-3553     | chr1  | 216373115 | G   | A   | 537     | 0.0%   | 446     | 17.7%  | 157       | USH2A    | Missense///Misser | p.A1222V///p.A1222V  |
| D-04-0069-T | chr1  | 216373156 | C   | A   | 359     | 0.0%   | 679     | 42.3%  | 225       | USH2A    | Missense///Misser | p.W1208C///p.W1208C  |
| D-08-0611-T | chr10 | 32562198  | C   | A   | 431     | 0.2%   | 286     | 29.4%  | 225       | EPC1     | Nonsense          | p.E586*              |
| D-09-0634-T | chr12 | 117703231 | C   | A   | 1007    | 0.0%   | 350     | 33.7%  | 225       | NOS1     | Missense          | p.G676C              |
| CG-3589     | chr12 | 117723064 | G   | A   | 412     | 0.0%   | 569     | 45.9%  | 225       | NOS1     | Missense          | p.T455I              |
| D-987-1E-T  | chr14 | 42355932  | C   | T   | 597     | 0.2%   | 487     | 16.4%  | 110       | LRFN5    | Missense          | p.T35I               |
| CG-3560     | chr14 | 71445051  | C   | T   | 205     | 0.5%   | 175     | 52.0%  | 225       | PCNX     | Missense          | p.P666L              |
| CG-3609     | chr15 | 28387512  | C   | T   | 446     | 0.0%   | 207     | 37.7%  | 225       | HERC2    | Missense          | p.E3858K             |
| CG-3609     | chr15 | 28443550  | G   | A   | 495     | 0.0%   | 287     | 29.6%  | 225       | HERC2    | Missense          | p.T2662I             |
| CG-3609     | chr17 | 3627816   | T   | C   | 340     | 0.3%   | 115     | 27.8%  | 225       | GSG2     | Missense          | p.V196A              |
| D-09-0439-T | chr2  | 141739739 | C   | G   | 674     | 0.0%   | 496     | 38.9%  | 225       | LRP1B    | Missense          | p.M959I              |
| CG-3560     | chr2  | 141773291 | C   | T   | 241     | 0.0%   | 326     | 22.7%  | 173       | LRP1B    | Missense          | p.V722I              |
| D-06-0427-T | chr2  | 170044680 | C   | T   | 507     | 0.0%   | 432     | 38.7%  | 225       | LRP2     | Missense          | p.R3043H             |

|             |       |           |   |   |         |          |     |          |           |        |                   |                     |
|-------------|-------|-----------|---|---|---------|----------|-----|----------|-----------|--------|-------------------|---------------------|
| CG-3609     | chr2  | 170077027 | G | T | 495     | 0.4%     | 310 | 34.8%    | 225       | LRP2   | Missense          | p.A1862D            |
| D-987-1E-T  | chr2  | 170148856 | G | C | 496     | 0.0%     | 443 | 15.8%    | 55        | LRP2   | Missense          | p.Q226E             |
| D-1225-T    | chr2  | 170175279 | T | A | 229     | 0.0%     | 500 | 33.8%    | 225       | LRP2   | Missense          | p.Q101H             |
| CG-3589     | chr20 | 40739031  | C | T | 398     | 0.3%     | 925 | 27.0%    | 225       | PTPRT  | Missense///Misser | p.V1066I///p.V1085I |
| D-01-0141-T | chr20 | 40743859  | G | A | 378     | 0.0%     | 629 | 44.0%    | 225       | PTPRT  | Missense///Misser | p.R1027C///p.R1046C |
| D-09-0362-T | chr22 | 21346566  | G | T | 460     | 0.0%     | 226 | 39.8%    | 225       | LZTR1  | Nonsense          | p.E353*             |
| CG-3560     | chr22 | 25155856  | C | T | 352     | 0.9%     | 306 | 19.0%    | 134       | PIWIL3 | Missense          | p.G68E              |
| CG-3567     | chr4  | 189068521 | G | A | 432     | 0.7%     | 354 | 43.8%    | 225       | TRIML1 | Missense          | p.V468I             |
| CG-3589     | chr5  | 45262787  | C | T | 437     | 0.5%     | 509 | 48.7%    | 225       | HCN1   | Missense          | p.A637T             |
| D-09-0386-T | chr5  | 45696092  | g | T | 122     | 0.0%     | 100 | 51.0%    | 225       | HCN1   | Missense          | p.A35D              |
| D-09-0362-T | chr5  | 129241099 | C | T | 368     | 0.3%     | 284 | 35.6%    | 225       | CHSY3  | Missense          | p.R193W             |
| CG-3596     | chr5  | 150943071 | G | A | 531     | 0.0%     | 272 | 28.7%    | 225       | FAT2   | Missense          | p.A1130V            |
| D-09-0527-T | chr5  | 161116713 | G | A | 129     | 0.0%     | 275 | 39.3%    | 225       | GABRA6 | Missense          | p.E201K             |
| D-10-0171-T | chr5  | 161119130 | G | C | 943     | 0.0%     | 435 | 39.8%    | 225       | GABRA6 | Missense          | p.R337T             |
| CG-3572     | chr6  | 46847711  | C | A | 719     | 0.1%     | 392 | 40.1%    | 225       | GPR116 | Nonsense///Nonse  | p.E294*///p.E294*   |
| D-09-0634-T | chr6  | 51768831  | G | A | 32      | 0.0%     | 432 | 43.1%    | 106       | PKHD1  | Missense///Misser | p.T2273M///p.T2273M |
| CG-3553     | chr6  | 51920425  | G | A | 583     | 0.2%     | 410 | 17.1%    | 130       | PKHD1  | Missense///Misser | p.P599L///p.P599L   |
| CG-3567     | chr8  | 25181445  | G | A | 592     | 0.0%     | 759 | 40.4%    | 225       | DOCK5  | Missense          | p.R566K             |
| CG-3602     | chr8  | 25261204  | C | T | 494     | 0.0%     | 294 | 43.2%    | 225       | DOCK5  | Missense          | p.S1686L            |
| D-06-0427-T | chr8  | 104933973 | G | A | 586     | 0.0%     | 425 | 21.9%    | 193       | RIMS2  | Missense///Misser | p.M719I///p.M527I   |
| CG-3612     | chr8  | 105001535 | G | A | 555     | 0.4%     | 450 | 28.7%    | 225       | RIMS2  | Missense///Misser | p.R977Q///p.R769Q   |
| D-10-0171-T | chr8  | 105025741 | G | A | 912     | 0.2%     | 440 | 41.8%    | 225       | RIMS2  | Missense///Misser | p.R1039Q///p.R853Q  |
| CG-3609     | chr9  | 16437492  | C | T | 361     | 0.3%     | 153 | 35.3%    | 225       | BNC2   | Missense          | p.A234T             |
| CG-3609     | chrX  | 39914722  | C | T | 511     | 0.2%     | 292 | 36.0%    | 225       | BCOR   | Missense///Misser | p.R1513Q///p.R1495Q |
| CG-3609     | chrX  | 39923014  | G | A | 479     | 0.4%     | 240 | 17.9%    | 56        | BCOR   | Nonsense///Nonse  | p.Q1198*///p.Q1180* |
| D-08-0624-T | chr2  | 141526899 | G | A | 9216.77 | 697      | 287 | 410      | c.5641C>T | LRP1B  | Missense          | p.L1881F            |
| D-01-0141-T | chr20 | 40743859  | G | A | 9129.77 | 912      | 532 | 380      | c.3079C>T | PTPRT  | Missense///Misser | p.R1027C///p.R1046C |
| CG-3609     | chr14 | 71500751  | G | A | 118.77  | 512      | 450 | 62       | c.3772G>A | PCNX   | Missense          | p.V1258I            |
| CG-3609     | chr12 | 57553626  | G | A | 155.77  | 404      | 350 | 50       | c.1817G>A | LRP1   | Missense          | p.G606D             |
| CG-3469     | chrX  | 39930363  | C | T | 448     | 0.002232 | 341 | 0.369501 | 225       | BCOR   | Missense///Misser | p.G1034D///p.G1016D |
| CG-3469     | chr5  | 11111107  | C | T | 814     | 0.001229 | 298 | 0.325503 | 225       | CTNND2 | Missense          | p.A776T             |
| MB54        | chr5  | 11199650  | T | G | 290     | 0        | 180 | 0.272222 | 225       | CTNND2 | Missense          | p.K629Q             |

|         |       |           |   |   |     |          |     |          |     |         |                   |                      |
|---------|-------|-----------|---|---|-----|----------|-----|----------|-----|---------|-------------------|----------------------|
| CG-3346 | chr12 | 57910759  | C | T | 267 | 0        | 370 | 0.278378 | 225 | DDIT3   | Missense          | p.A115T              |
| CG-3469 | chr12 | 57910825  | C | T | 707 | 0        | 321 | 0.274143 | 225 | DDIT3   | Missense          | p.E93K               |
| CG-3442 | chr5  | 150920231 | T | C | 708 | 0.001412 | 460 | 0.430435 | 225 | FAT2    | Missense          | p.K2979R             |
| MB67    | chr5  | 150933942 | C | G | 249 | 0        | 201 | 0.358209 | 225 | FAT2    | Missense          | p.G1309A             |
| CG-3469 | chr5  | 150947868 | G | A | 742 | 0        | 325 | 0.344615 | 225 | FAT2    | Missense          | p.L209F              |
| CG-3512 | chr6  | 46826711  | C | T | 528 | 0        | 609 | 0.241379 | 225 | GPR116  | Missense///Misser | p.E977K///p.E977K    |
| CG-3507 | chr5  | 45262184  | G | A | 423 | 0.002364 | 372 | 0.336022 | 225 | HCN1    | Missense          | p.R838C              |
| CG-3375 | chr5  | 45262126  | G | T | 619 | 0.003231 | 492 | 0.321138 | 225 | HCN1    | Missense          | p.P857H              |
| MB54    | chr15 | 28424116  | C | T | 250 | 0        | 171 | 0.175439 | 105 | HERC2   | Missense          | p.G3027D             |
| MB54    | chr2  | 141660555 | T | C | 251 | 0.003984 | 207 | 0.173913 | 94  | LRP1B   | Missense          | p.T1234A             |
| CG-3346 | chr2  | 170072888 | C | T | 290 | 0        | 410 | 0.309756 | 225 | LRP2    | Missense          | p.A1901T             |
| CG-3469 | chr2  | 170115595 | C | T | 965 | 0.001036 | 497 | 0.203219 | 177 | LRP2    | Missense          | p.R818K              |
| CG-3346 | chr22 | 21345988  | C | T | 247 | 0        | 289 | 0.273356 | 225 | LZTR1   | Missense          | p.T288I              |
| CG-3466 | chr12 | 117710315 | C | T | 232 | 0        | 254 | 0.429134 | 225 | NOS1    | Missense          | p.V572M              |
| CG-3346 | chr12 | 117724006 | G | A | 278 | 0        | 434 | 0.276498 | 225 | NOS1    | Missense          | p.T398I              |
| CG-3346 | chr12 | 117703242 | C | T | 270 | 0        | 353 | 0.212465 | 122 | NOS1    | Missense          | p.R672H              |
| CG-3465 | chrX  | 91133620  | T | C | 544 | 0        | 175 | 0.251429 | 224 | PCDH11X | Missense///Misser | p.V794A///p.V794A/// |
| CG-3346 | chrX  | 91518135  | C | T | 167 | 0        | 234 | 0.192308 | 75  | PCDH11X | Missense          | p.A1046V             |
| MB54    | chrX  | 91642930  | C | A | 104 | 0        | 72  | 0.138889 | 66  | PCDH11X | Missense///Misser | p.S1114Y///p.S1104Y  |
| MB54    | chrX  | 91873904  | G | A | 190 | 0        | 160 | 0.13125  | 49  | PCDH11X | Missense///Misser | p.G1337S///p.G1327S  |
| CG-3469 | chr14 | 71492853  | C | T | 851 | 0.00235  | 451 | 0.290466 | 225 | PCNX    | Missense          | p.A1068V             |
| MB54    | chr14 | 71434960  | G | C | 241 | 0        | 249 | 0.236948 | 225 | PCNX    | Missense          | p.G172R              |
| MB63    | chr6  | 51613077  | A | G | 185 | 0.005405 | 180 | 0.5      | 225 | PKHD1   | Missense///Misser | p.S3113P///p.S3113P  |
| CG-3346 | chr6  | 51936946  | G | A | 365 | 0        | 494 | 0.263158 | 225 | PKHD1   | Missense///Misser | p.P190L///p.P190L    |
| MB54    | chr6  | 51735365  | C | A | 255 | 0        | 217 | 0.175115 | 92  | PKHD1   | Missense///Misser | p.V2475F///p.V2475F  |
| MB54    | chr6  | 51695675  | G | C | 300 | 0.003333 | 207 | 0.15942  | 61  | PKHD1   | Missense///Misser | p.D2762E///p.D2762E  |
| MB54    | chr6  | 51890038  | G | T | 288 | 0        | 136 | 0.147059 | 80  | PKHD1   | Missense///Misser | p.L1524I///p.L1524I  |
| CG-3469 | chr3  | 135809422 | G | A | 839 | 0.001192 | 383 | 0.334204 | 225 | PPP2R3A | Missense///Misser | p.G947E///p.G326E    |
| CG-3469 | chr8  | 104922404 | G | A | 900 | 0.003333 | 375 | 0.309333 | 225 | RIMS2   | Missense///Misser | p.S556N///p.S364N    |
| CG-3477 | chr8  | 105263324 | A | T | 738 | 0        | 607 | 0.163097 | 112 | RIMS2   | Missense///Misser | p.K1255I///p.K1069I  |
| CG-3477 | chr9  | 27158002  | C | A | 813 | 0        | 531 | 0.250471 | 225 | TEK     | Missense          | p.Q76K               |
| CG-3469 | chr20 | 51872033  | G | A | 648 | 0.001543 | 295 | 0.352542 | 225 | TSHZ2   | Missense          | p.G679E              |

**Supplementary Table 6.** Enrichment of copy number variants and single nucleotide variants in MutComFocal genes. For each gene, statistical significance for enrichment of amplified genes for SNVs as well as deleted genes for SNVs was assessed using Fisher's exact test. Annotation information in each column is described below:

gene: MutComFocal gene

mut: Number of samples with mutations (SNVs)

amp+mut: Number of samples with amplifications and mutations

amp: Number of samples with amplifications

p-value (amp+mut): Fisher's exact p-value for enrichment of amplifications and mutations

del+mut: Number of samples with deletions and mutations

del: Number of samples with deletions

p-value (del+mut): Fisher's exact p-value for enrichment of deletions and mutations

| Gene    | Mutations | Amplification/Mutation | Amplification | Fisher exact (amp/mut) | Deletion/Mutation | Deletion | Fisher exact (del/mut) |
|---------|-----------|------------------------|---------------|------------------------|-------------------|----------|------------------------|
| LZTR1   | 5         | 0                      | 2             | 1                      | 4                 | 27       | 0.007005               |
| GPR116  | 4         | 0                      | 1             | 1                      | 1                 | 8        | 0.22998                |
| PCDH11X | 3         | 0                      | 13            | 1                      | 1                 | 19       | 0.38504                |
| PCNX    | 4         | 0                      | 1             | 1                      | 1                 | 23       | 0.55191                |
| BCOR    | 5         | 1                      | 14            | 0.44512                | 0                 | 23       | 1                      |
| BCORL1  | 1         | 0                      | 15            | 1                      | 0                 | 24       | 1                      |
| CTNND2  | 3         | 0                      | 1             | 1                      | 0                 | 3        | 1                      |
| DDIT3   | 1         | 1                      | 20            | 0.15625                | 0                 | 5        | 1                      |
| FAT2    | 6         | 0                      | 1             | 1                      | 0                 | 3        | 1                      |
| HCN1    | 5         | 0                      | 1             | 1                      | 0                 | 3        | 1                      |
| HERC2   | 4         | 0                      | 5             | 1                      | 0                 | 13       | 1                      |
| LRP1B   | 3         | 0                      | 1             | 1                      | 0                 | 0        | 1                      |
| LRP2    | 6         | 0                      | 0             | 1                      | 0                 | 0        | 1                      |
| NLRP2   | 1         | 0                      | 21            | 1                      | 0                 | 8        | 1                      |
| NOS1    | 5         | 0                      | 2             | 1                      | 0                 | 2        | 1                      |
| NOS1AP  | 1         | 0                      | 3             | 1                      | 0                 | 0        | 1                      |

|         |   |   |    |   |   |    |   |
|---------|---|---|----|---|---|----|---|
| PCNXL3  | 1 | 0 | 1  | 1 | 0 | 1  | 1 |
| PKHD1   | 5 | 0 | 0  | 1 | 0 | 6  | 1 |
| PKHD1L1 | 1 | 0 | 3  | 1 | 0 | 1  | 1 |
| PPP2R3A | 4 | 0 | 3  | 1 | 0 | 5  | 1 |
| RIMS2   | 6 | 0 | 3  | 1 | 0 | 1  | 1 |
| TEK     | 3 | 0 | 2  | 1 | 0 | 56 | 1 |
| TEKT4   | 1 | 0 | 1  | 1 | 0 | 1  | 1 |
| TSHZ2   | 3 | 0 | 27 | 1 | 0 | 0  | 1 |

**Supplementary Table 7.** Correlation between copy number and expression in MutComFocal gene candidates. Pearson's correlation is computed along with the corresponding p-value calculated by the paired Student's t-test.

| Gene           | Corr     | P-val             |
|----------------|----------|-------------------|
| <b>DDIT3</b>   | 0.650937 | <10 <sup>-6</sup> |
| <b>LZTR1</b>   | 0.356576 | <10 <sup>-6</sup> |
| <b>PCNX</b>    | 0.407483 | <10 <sup>-6</sup> |
| <b>PPP2R3A</b> | 0.230559 | 0.000001          |
| <b>HERC2</b>   | 0.203723 | 0.000016          |
| <b>RIMS2</b>   | 0.152049 | 0.001362          |
| <b>TEK</b>     | 0.134765 | 0.004583          |
| <b>CTNND2</b>  | 0.101266 | 0.033501          |
| <b>NOS1</b>    | 0.094272 | 0.047872          |

**Supplementary Table 8.** Allele-specific expression of MutComFocal gene candidates. For each mutation, we calculate the number of reads calling the reference (R) and variant (V) allele. We calculate a score for allele-specific expression of the variant  $V/(V+R)$ , as well as the corresponding pooled p-value per gene. Finally, we include the copy number and expression log ratios between tumor and normal per gene. Annotation information in each column is described below:

Gene: MutComFocal gene

sample: TCGA sample

ref: Reference allele

var: Variant allele

CNV: Copy number log2 ratio

Exp: Expression log2 ratio

total\_depth: Total depth of reads

ref\_depth R: Depth of reads calling reference allele

var\_depth V: Depth of reads calling variant allele

$V/(V+R)$ : Monoallelic expression of variant allele

pval\_per\_gene: Pooled p-value of monoallelic expression of a gene

| Gene  | sample                                        | ref | var | CNV     | Exp       | total_depth | ref_depth R | var_depth V | $V/(V+R)$ | pval_per_gene |
|-------|-----------------------------------------------|-----|-----|---------|-----------|-------------|-------------|-------------|-----------|---------------|
| LZTR1 | TCGA-06-2562.chr22:21340179-21340179.T.C.vcf  | T   | C   | -0.7697 | -1.365875 | 50          | 15          | 35          | 0.7       | 0.000704      |
| LZTR1 | TCGA-06-5413.chr22:21344765-21344765.G.A.vcf  | G   | A   | -0.4326 | -1.723125 | 40          | 15          | 24          | 0.615384  | 0.000704      |
| BCOR  | TCGA-06-2559.chrX:39923055-39923055.C.T.vcf   | C   | T   | 0.1682  | -0.491733 | 17          | 2           | 15          | 0.882352  | 0.002079      |
| BCOR  | TCGA-06-0171.chrX:39911528-39911528.A.C.vcf   | A   | C   | 0.3669  | -1.192733 | 30          | 30          | 0           | 0         | 0.002079      |
| HCN1  | TCGA-14-1034.chr5:45262901-45262901.A.G.vcf   | A   | G   | 0.0476  | -0.539077 | 3           | 3           | 0           | 0         | 0.065751      |
| HCN1  | TCGA-06-0747.chr5:45262309-45262309.T.A.vcf   | T   | A   | 0.0326  | 1.483769  | 3           | 3           | 0           | 0         | 0.065751      |
| HCN1  | TCGA-14-1034.chr5:45262901-45262901.A.G.vcf   | A   | G   | 0.0476  | -0.539077 | 0           | 0           | 0           | 0         | 0.065751      |
| HCN1  | TCGA-26-5135.chr5:45262136-45262136.G.A.vcf   | G   | A   | -0.0083 | -1.142545 | 0           | 0           | 0           | 0         | 0.065751      |
| HCN1  | TCGA-26-5135.chr5:45353296-45353296.C.T.vcf   | C   | T   | -0.0083 | -1.142545 | 0           | 0           | 0           | 0         | 0.065751      |
| FAT2  | TCGA-14-1034.chr5:150901466-150901466.G.A.vcf | G   | A   | 0.0381  | 0.150333  | 0           | 0           | 0           | 0         | 0.088672      |
| FAT2  | TCGA-06-5413.chr5:150947262-150947262.G.A.vcf | G   | A   | 0.0222  | -0.505333 | 1           | 1           | 0           | 0         | 0.088672      |
| FAT2  | TCGA-14-1034.chr5:150901466-150901466.G.A.vcf | G   | A   | 0.0381  | 0.150333  | 0           | 0           | 0           | 0         | 0.088672      |
| FAT2  | TCGA-19-2629.chr5:150934173-150934173.A.G.vcf | A   | G   | 0.0516  | 0.254     | 0           | 0           | 0           | 0         | 0.088672      |
| PKHD1 | TCGA-06-0152.chr6:51889738-51889738.G.A.vcf   | G   | A   | 0.0667  | 0.073818  | 0           | 0           | 0           | 0         | 0.088672      |

|                |                                                 |     |   |         |           |      |      |     |          |          |
|----------------|-------------------------------------------------|-----|---|---------|-----------|------|------|-----|----------|----------|
| <b>PKHD1</b>   | TCGA-06-0171.chr6:51799064-51799064.G.A.vcf     | G   | A | 0.1631  | -0.172182 | 0    | 0    | 0   | 0        | 0.088672 |
| <b>PKHD1</b>   | TCGA-06-1804.chr6:51523897-51523897.C.T.vcf     | C   | T | 0.0226  | -0.585455 | 0    | 0    | 0   | 0        | 0.088672 |
| <b>PKHD1</b>   | TCGA-26-5134.chr6:51484145-51484145.G.C.vcf     | G   | C | 0.0235  | 0.033444  | 0    | 0    | 0   | 0        | 0.088672 |
| <b>PCNX</b>    | TCGA-06-0238.chr14:71495452-71495452.A.C.vcf    | A   | C | 0.0267  | -0.849    | 4    | 1    | 3   | 0.749998 | 0.089058 |
| <b>PCNX</b>    | TCGA-26-5134.chr14:71540387-71540387.C.T.vcf    | C   | T | -0.8095 | -1.2234   | 3    | 3    | 0   | 0        | 0.089058 |
| <b>GPR116</b>  | TCGA-06-2565.chr6:46826170-46826170.G.A.vcf     | G   | A | -0.0145 | 3.228714  | 118  | 118  | 0   | 0        | 0.121353 |
| <b>GPR116</b>  | TCGA-12-0619.chr6:46856078-46856078.T.C.vcf     | T   | C | 0.1473  | 1.792357  | 12   | 12   | 0   | 0        | 0.121353 |
| <b>GPR116</b>  | TCGA-27-1835.chr6:46826114-46826114.C.T.vcf     | C   | T | -0.8081 | 3.319786  | 34   | 34   | 0   | 0        | 0.121353 |
| <b>HERC2</b>   | TCGA-02-2483.chr15:28501298-28501298.A.C.vcf    | A   | C | -0.0668 | -0.0888   | 1    | 1    | 0   | 0        | 0.170074 |
| <b>HERC2</b>   | TCGA-06-2559.chr15:28501298-28501298.A.C.vcf    | A   | C | -0.1225 | -0.5756   | 0    | 0    | 0   | 0        | 0.170074 |
| <b>LRP2</b>    | TCGA-06-2563.chr2:170090092-170090092.G.A.vcf   | G   | A | -0.0111 | -0.147    | 0    | 0    | 0   | 0        | 0.170074 |
| <b>LRP2</b>    | TCGA-06-2559.chr2:170009381-170009381.A.G.vcf   | A   | G | 0.0164  | -0.086091 | 2    | 2    | 0   | 0        | 0.170074 |
| <b>PCDH11X</b> | TCGA-06-2559.chrX:91132792-91132792.G.A.vcf     | G   | A | 0.183   | 0.043333  | 0    | 0    | 0   | 0        | 0.170074 |
| <b>PCDH11X</b> | TCGA-19-2619.chrX:91132985-91132985.C.A.vcf     | C   | A | NaN     | 0.315     | 0    | 0    | 0   | 0        | 0.170074 |
| <b>RIMS2</b>   | TCGA-06-2563.chr8:104922392-104922392.C.T.vcf   | C   | T | -0.0144 | 0.645727  | 3    | 3    | 0   | 0        | 0.170074 |
| <b>RIMS2</b>   | TCGA-06-0744.chr8:105001597-105001597.C.T.vcf   | C   | T | 0.0634  | 0.358455  | 1    | 1    | 0   | 0        | 0.170074 |
| <b>DDIT3</b>   | TCGA-06-0238.chr12:57911096-57911096.C.A.vcf    | C   | A | 2.4725  | 2.5065    | 1433 | 1433 | 0   | 0        | 0.25     |
| <b>LRP1B</b>   | TCGA-06-2557.chr2:141986959-141986959.C.A.vcf   | C   | A | -0.0711 | 4.093     | 2    | 2    | 0   | 0        | 0.25     |
| <b>NOS1</b>    | TCGA-06-5415.chr12:117710315-117710315.C.T.vcf  | C   | T | 0.3943  | 0.134125  | 0    | 0    | 0   | 0        | 0.25     |
| <b>NOS1AP</b>  | TCGA-19-2629.chr1:162257211-162257213.GAA.-.vcf | GAA | - | 0.0673  | -0.4058   | 14   | 14   | 0   | 0        | 0.25     |
| <b>PCNXL3</b>  | TCGA-12-0619.chr11:65383841-65383841.G.-.vcf    | G   | - | -0.2392 | NaN       | 8    | 8    | 0   | 0        | 0.25     |
| <b>PKHD1L1</b> | TCGA-06-0645.chr8:110476724-110476724.G.A.vcf   | G   | A | 0.0133  | -0.128545 | 0    | 0    | 0   | 0        | 0.25     |
| <b>PPP2R3A</b> | TCGA-06-2570.chr3:135721982-135721982.G.A.vcf   | G   | A | 0.0168  | -0.081375 | 6    | 6    | 0   | 0        | 0.25     |
| <b>TEKT4</b>   | TCGA-06-0238.chr2:95537569-95537569.G.A.vcf     | G   | A | -0.0742 | 0.156     | 0    | 0    | 0   | 0        | 0.25     |
| <b>TEK</b>     | TCGA-06-0184.chr9:27229172-27229172.C.T.vcf     | C   | T | 0.0973  | 0.685     | 18   | 18   | 0   | 0        | 0.25     |
| <b>TSHZ2</b>   | TCGA-12-0618.chr20:51870661-51870661.G.A.vcf    | G   | A | -0.0659 | 2.6396    | 12   | 5    | 6   | 0.545454 | 0.290527 |
| <b>CTNND2</b>  | TCGA-06-2562.chr5:11565132-11565132.C.T.vcf     | C   | T | -0.0899 | 3.7124    | 64   | 35   | 29  | 0.453125 | 0.970506 |
| <b>CTNND2</b>  | TCGA-06-0686.chr5:11082954-11082954.G.A.vcf     | G   | A | -0.1561 | 4.0373    | 48   | 29   | 11  | 0.275    | 0.970506 |
| <b>CTNND2</b>  | TCGA-06-0878.chr5:11022883-11022883.A.C.vcf     | A   | C | 0.0531  | 4.3736    | 214  | 106  | 105 | 0.49763  | 0.970506 |



**Supplementary Table 9.** EST-based expression in the human brain of the novel GBM genes from NCBI.

| <b>UniGene</b> | <b>Start</b> | <b>brain (1100989)</b> |
|----------------|--------------|------------------------|
| <b>314543</b>  | CTNND2       | 295                    |
| <b>162757</b>  | LRP1         | 217                    |
| <b>148909</b>  | CHL1         | 122                    |
| <b>90791</b>   | GABRA6       | 115                    |
| <b>78788</b>   | LZTR1        | 79                     |
| <b>434890</b>  | HERC2        | 57                     |
| <b>522898</b>  | CHD5         | 56                     |
| <b>655271</b>  | RIMS2        | 53                     |
| <b>136893</b>  | LRFN5        | 53                     |
| <b>657729</b>  | LRP2         | 46                     |
| <b>89640</b>   | TEK          | 45                     |
| <b>167805</b>  | EPC1         | 41                     |
| <b>656461</b>  | LRP1B        | 39                     |
| <b>446559</b>  | PCNX         | 38                     |
| <b>526879</b>  | PTPRT        | 29                     |
| <b>362806</b>  | GPR116       | 27                     |
| <b>505777</b>  | DDIT3        | 25                     |
| <b>533468</b>  | HAUS6        | 23                     |
| <b>195403</b>  | DOCK5        | 21                     |

|               |                |           |
|---------------|----------------|-----------|
| <b>591255</b> | <b>FAT2</b>    | <b>18</b> |
| <b>518155</b> | <b>PPP2R3A</b> | <b>12</b> |
| <b>655673</b> | <b>PCDH11X</b> | <b>10</b> |
| <b>656581</b> | <b>BNC2</b>    | <b>9</b>  |
| <b>132599</b> | <b>DOCK8</b>   | <b>8</b>  |
| <b>353176</b> | <b>HCN1</b>    | <b>8</b>  |
| <b>405659</b> | <b>PIWIL1</b>  | <b>7</b>  |
| <b>208388</b> | <b>FANCD2</b>  | <b>7</b>  |
| <b>473117</b> | <b>TSHZ2</b>   | <b>6</b>  |
| <b>534059</b> | <b>GSG2</b>    | <b>4</b>  |
| <b>377488</b> | <b>TPTE2</b>   | <b>1</b>  |
| <b>655974</b> | <b>USH2A</b>   | <b>1</b>  |
| <b>593292</b> | <b>ADCY5</b>   | <b>1</b>  |
| <b>348618</b> | <b>TRIML1</b>  | <b>1</b>  |
| <b>662050</b> | <b>PKHD1</b>   | <b>0</b>  |
| <b>611691</b> | <b>CHSY3</b>   | <b>0</b>  |
| <b>186424</b> | <b>BCOR</b>    | <b>0</b>  |
| <b>628475</b> | <b>TRIML2</b>  | <b>0</b>  |
| <b>448343</b> | <b>PIWIL3</b>  | <b>0</b>  |
| <b>735734</b> | <b>NOS1</b>    | <b>0</b>  |

**Supplementary Table 10.** Gene fusions identified through RNA sequencing. This item is presented separately as an Excel file.

Annotation information in each column is described below:

sample: Name of TCGA or private sample.

#chrom5p: 5' chromosome

#start5p: 5' genomic start coordinate

#end5p: 5' genomic end coordinate

#chrom3p: 3' chromosome

#start3p: 3' genomic start coordinate

#end3p: 3' genomic end coordinate

strand5p: 5' strand

strand3p: 3' strand

genes5p: 5' gene

genes3p: 3' gene

total\_frgs (split inserts+split reads): Total number of split inserts and split reads

spanning\_frgs (split reads): Number of split reads

GeneBreakpoint5p: The genomic coordinate of the breakpoint in the 5' gene

GeneBreakpoint3p: The genomic coordinate of the breakpoint in the 3' gene

FrameType: Reading frame of gene fusions. Values include in-frame, frameshift, or null (no transcript information was found in the Ensembl Homo\_sapiens.GRCh37.60.gtf file).

FusedSequence: Reconstructed sequence of the fusion RNA transcript

ProteinStart5p: The start coordinate of the 5' protein segment

ProteinStop5p: The stop coordinate (breakpoint) of the 5' protein segment

ProteinStart3p: The start coordinate (breakpoint) of the 3' protein segment

ProteinStop3p: The stop coordinate of the 3' protein segment

ProteinSequence: Reconstructed sequence of the fusion protein

ExonBreak5p: The last exon of the 5' gene before the breakpoint

ExonBreak3p: The first exon of the 3' gene after the breakpoint

**Supplementary Table 11.** Relative expression of EGFR fusion and wild-type transcripts. Expression is estimated using the depth of reads covering the fusion breakpoint or wild-type exon junctions excluded from the fusion transcript. These wild-type exons include exons 25-26, 26-27, and 27-28.

| <b>EGFR-SEPT14</b> |          |           |           |           |
|--------------------|----------|-----------|-----------|-----------|
| Sample             | FusionBp | Exon25-26 | Exon26-27 | Exon27-28 |
| TCGA-28-2513       | 1464     | 21        | 12        | 25        |
| TCGA-27-1837       | 796      | 6         | 5         | 6         |
| TCGA-06-0750       | 414      | 69        | 61        | 101       |
| TCGA-32-5222       | 495      | 256       | 190       | 348       |
| TCGA-28-1747       | 142      | 426       | 300       | 502       |
| TCGA-06-2557       | 13       | 1031      | 657       | 1254      |

| <b>EGFR-PSPH</b> |          |           |           |           |
|------------------|----------|-----------|-----------|-----------|
| Sample           | FusionBp | Exon25-26 | Exon26-27 | Exon27-28 |
| TCGA-28-5209     | 5648     | 216       | 122       | 232       |
| TCGA-06-5408     | 37       | 232       | 200       | 292       |
| TCGA-28-5215     | 28       | 29        | 26        | 44        |

**Supplementary Table 12.** Genomic breakpoints of gene fusions detected through whole-exome DNA sequencing. This item is presented separately as an Excel file. Annotation information in each column is described below:

sample: Name of TCGA sample

split reads: Total number of split reads

gene5p: 5' gene

chr5p: 5' chromosome

sense5p: 5' sense

start5p: 5' genomic start coordinate

end5p: 5' genomic end coordinate

breakpoint5p: 5' genomic coordinate of breakpoint

exonBeforeBreakpoint5p: Exon number of 5' gene before the breakpoint

gene3p: 3' gene

chr3p: 3' chromosome

sense3p: 3' sense

start3p: 3' genomic start coordinate

end3p: 3' genomic end coordinate

breakpoint3p: 3' genomic coordinate of breakpoint

exonAfterBreakpoint3p: Exon number of 3' gene after the breakpoint

split inserts: Total number of split inserts

posA5p: Coordinate of split insert read closest to 5' end in 5' gene

posB5p: Coordinate of split insert read closest to 3' end in 5' gene

readDir5p: Read direction of split insert reads in 5' gene

posA3p: Coordinate of split insert read closest to 5' end in 3' gene

posB3p: Coordinate of split insert read closest to 3' end in 3' gene

readDir3p: Read direction of split insert reads in 3' gene.

**Supplementary Table 13.** Analysis of the incidence of EGFR-SEPT14 and EGFR-PSPH gene fusions in GBM harboring or not the EGFRvIII rearrangement.

| <b>Isoform</b>     | <b>EGFR-SEPT14</b> | <b>EGFR-PSPH</b> | <b>Non-Fusion</b> | <b>Total</b> |
|--------------------|--------------------|------------------|-------------------|--------------|
| <b>EGFRvIII</b>    | 1                  | 1                | 14                | 16           |
| <b>No EGFRvIII</b> | 5                  | 2                | 64                | 71           |
| <b>Total</b>       | 6                  | 3                | 78                | 87           |

**Supplementary Table 14.** Enrichment of classical/mesenchymal subtype among samples with EGFR-SEPT14 or EGFR-PSPH.

|                    | <b>Classical</b> | <b>Mesenchymal</b> | <b>Proneural</b> | <b>Neural</b> |
|--------------------|------------------|--------------------|------------------|---------------|
| <b>EGFR Fusion</b> | 3                | 5                  | 1                | 0             |
| <b>No Fusion</b>   | 37               | 47                 | 38               | 0             |
| <b>Total</b>       | 40               | 52                 | 39               | 28            |

Fisher's p-value = 0.0500 for the enrichment of classical/mesenchymal subtype.

**Supplementary Table 15.** Antibodies and concentrations used in immunofluorescence staining.

|                                    |                   |               |                           |
|------------------------------------|-------------------|---------------|---------------------------|
| <b>B-III Tubulin</b>               | <b>Mouse</b>      | <b>1:400</b>  | <b>Promega</b>            |
| <b><math>\delta</math>-Catenin</b> | <b>Guinea Pig</b> | <b>1:500</b>  | <b>Acris</b>              |
| <b>Fibronectin</b>                 | <b>Mouse</b>      | <b>1:1000</b> | <b>BD-Pharmingen</b>      |
| <b>Col5A1</b>                      | <b>Rabbit</b>     | <b>1:200</b>  | <b>Santa Cruz Biotech</b> |
| <b>PSD-95</b>                      | <b>Rabbit</b>     | <b>1:500</b>  | <b>Invitrogen</b>         |
| <b>Smooth muscle actin</b>         | <b>Mouse</b>      | <b>1:200</b>  | <b>Sigma</b>              |



**Supplementary Table 16.** Antibodies and concentrations used for Western blots and immunoprecipitation assays.

|                   |            |        |                    |
|-------------------|------------|--------|--------------------|
| Anti-Vinculin     | Mouse      | 1:400  | SIGMA              |
| Anti-N-Cadherin   | Mouse      | 1:200  | BD-Pharmingen      |
| Cyclin A          | Rabbit     | 1:500  | Santa Cruz Biotech |
| p27               | Mouse      | 1:250  | BD Transduction    |
| B-III Tubulin     | Mouse      | 1:400  | Promega            |
| $\delta$ -Catenin | Guinea Pig | 1:500  | Acris              |
| Fibronectin       | Mouse      | 1:1000 | BD-Pharmingen      |
| p107              | Rabbit     | 1:1000 | Santa Cruz Biotech |
| Nestin            | Mouse      | 1:500  | BD-Pharmingen      |
| CD133             | Rabbit     | 1:200  | Abcam              |
| Sox2              | Rabbit     | 1:500  | Cell Signaling     |
| EGFR              | Mouse      | 1:1000 | Millipore          |
| AKT               | Rabbit     | 1:1000 | Cell Signaling     |
| pAKT-S473         | Rabbit     | 1:1000 | Cell Signaling     |
| ERK1/2            | Rabbit     | 1:1000 | Cell Signaling     |
| pERK1/2           | Rabbit     | 1:1000 | Cell Signaling     |
| STAT3             | Rabbit     | 1:1000 | Santa Cruz Biotech |
| pSTAT3-Y705       | Rabbit     | 1:1000 | Cell Signaling     |
| LZTR1             | Rabbit     | 1:1000 | Abcam              |
| Cul3              | Rabbit     | 1:1000 | Bethyl             |

**Supplementary Table 17.** Primers used for screening gene fusions from cDNA.

|                       |                                          |
|-----------------------|------------------------------------------|
| <b>hEGFR-RT-FW1</b>   | <b>5'- GGGTGACTGTTTGGGAGTTGATG -3';</b>  |
| <b>hSEP14-RT-REV1</b> | <b>5'- TGTTTGTCTTTCTTTGTATCGGTGC-3';</b> |
| <b>hEGFR-RT-FW1</b>   | <b>5'-AGAGGTGACCACCAATCAGC-3';</b>       |
| <b>hPSPH-RT-REV1</b>  | <b>5'-CGTGTCCCACACAGAGACAG-3';</b>       |
| <b>hNFASC-RT- FW1</b> | <b>5'- AGTTCCGTGTCATTGCCATCAAC-3';</b>   |
| <b>hNTRK1-RT-REV1</b> | <b>5'- TGTTTCGTCCTTCTTCTCCACCG-3';</b>   |
| <b>hCAND1-RT- FW1</b> | <b>5'- GGAAAAAATGACATCCAGCGAC-3'</b>     |
| <b>hEGFR-RT-REV1</b>  | <b>5'- TGGGTGTAAGAGGCTCCACAAG-3'</b>     |

**Supplementary Table 18.** Primers used for genomic detection of gene fusions.

|                            |                                        |
|----------------------------|----------------------------------------|
| <b>genomic EGFR-FW1</b>    | <b>5'- GGATGATAGACGCAGATAGTCGCC-3'</b> |
| <b>genomic SEPT14-REV1</b> | <b>5'- TCCAGTTGTTTTTCTCTTCCTCG-3'</b>  |
| <b>genomic NFASC-FW1</b>   | <b>5'- TCCGAGTCCAGGCTGAAAATG-3'</b>    |
| <b>genomic NTRK1-REV1</b>  | <b>5'- CTA CTCCTATCTCACCCCAAAGG-3'</b> |
| <b>genomic CAND1-FW1</b>   | <b>5'- GCAATAGCAAACAGGAAGATGTC-3'</b>  |
| <b>genomic EGFR-REV1</b>   | <b>5'- GAACACTTACCCATTCGTTGG-3'</b>    |

**Supplementary Table 19.** Primers used for semiquantitative RT-PCR to detect exogenous Myc-LZTR1 WT and mutant LZTR1-R801W.

|             |                               |
|-------------|-------------------------------|
| LZTR1 FW    | 5'- TCCCACATCTCAGACAAGCA-3'   |
| His-Tag REV | 5'- TCAATGGTGATGGTGATGATG-3'  |
| GAPDH FW    | 5'- GAAGGTGAAGGTCGGAGTCAAC-3' |
| GAPDH REV   | 5'- CAGAGTTAAAAGCAGCCCTGGT-3' |

## References

- 1 Srivastava, M. *et al.* The Amphimedon queenslandica genome and the evolution of animal complexity. *Nature* 466, 720-726 (2010).
- 2 Stogios, P. J., Downs, G. S., Jauhal, J. J., Nandra, S. K. & Prive, G. G. Sequence and structural analysis of BTB domain proteins. *Genome Biol* 6, R82 (2005).
- 3 Soding, J. Protein homology detection by HMM-HMM comparison. *Bioinformatics* 21, 951-960 (2005).
